# Supplementary material
Source: PubMed Central journal article supplement (PMC3080139)
Supplement: NIHMS276754-supplement-Supplementary_data.pdf [file NIHMS276754-supplement-Supplementary_data.pdf]

## Supporting Information

### Conformationally Homogeneous Heterocyclic Pseudo-Tetrapeptides as Three-Dimensional Scaffolds for Rational Drug Design: Mapping the Structural Basis Set and Application to the Design of Receptor-Selective Somatostatin Analogues

John M. Beierle, W. Seth Horne, Jan H. van Maarseveen, Beatrice Waser, Jean Claude Reubi, and M. Reza Ghadiri\*

| <b>Contents:</b>                                                                    | <b>Page:</b> |
|-------------------------------------------------------------------------------------|--------------|
| 1. General experimental information                                                 | S2           |
| 2. Synthesis and characterization of peptides <b>1–4</b>                            | S2           |
| 3. Synthesis and characterization of peptides <b>7a–7h</b> and <i>ent-7a–ent-7h</i> | S5           |
| 4. Determination of somatostatin receptor affinity profiles                         | S9           |
| 5. Structural determinations and analysis                                           | S9           |
| 6. NOE tables                                                                       | S11          |
| 7. Analysis of compounds as mimics of various $\beta$ -turn motifs                  | S22          |
| 8. NMR spectra                                                                      | S24          |

## 1. General experimental information.

All amino acid starting materials were purchased from Novabiochem. 2-(7-Aza-1H-benzotriazole-1-yl)-1,1,3,3-tetramethyluronium hexafluorophosphate (HATU) was purchased from Applied Biosystems. 1-Hydroxybenzotriazole (HOBT) and *N*-(3-dimethylaminopropyl)-*N'*-ethylcarbodiimide hydrochloride (EDC·HCl) were purchased from ACROS. TBTA was synthesized according to the method of Sharpless and coworkers.<sup>S1</sup> All other reagents were purchased from Aldrich or Fischer Scientific unless otherwise noted and used without further purification. All NMR spectra were obtained on a Varian Inova-400 MHz, Bruker AMX-400 MHz, Bruker AMX-500 MHz, or Bruker DRX-600 MHz instrument (sometimes equipped with a cryo probe). In all cases the solvent peak was used as an internal reference for <sup>1</sup>H and <sup>13</sup>C calibration: CDCl<sub>3</sub> = 7.26 ppm and 77.0 ppm and DMSO-*d*<sub>6</sub> = 2.49 ppm and 39.5 ppm, respectively. Analytical and preparative RP-HPLC were carried out with C<sub>18</sub> columns using gradients of solvent A (99:1:0.1 [water/acetonitrile/TFA]) and solvent B (10:90:0.1 [water/acetonitrile/TFA]). Room temperature (RT) is defined as 22 °C.

## 2. Synthesis and characterization of peptides 1–4.

We have previously reported the feasibility of cyclic pseudo-hexapeptide synthesis via tandem dimerization/ macrocyclization steps involving 1,3-dipolar cycloadditions with pseudo-tripeptide substrates.<sup>S2</sup> To explore the scope of this synthetic strategy toward triazole-containing tetrapeptides, we examined the Cu<sup>I</sup>-catalyzed oligomerization/cyclization of linear tetrapeptide and dipeptide substrates. Subjecting linear pseudo tetrapeptide **12** to copper(I) iodide, followed by removal of the backbone dimethoxybenzyl protecting groups (introduced to enhance solubility), gave cyclic pseudo-tetrapeptide **2** as the major isolated product (31%) (Scheme S1). This reaction also gave significant amounts of larger oligomers as seen by HPLC analysis and insoluble material present in the final crude product mixture. In contrast, Cu<sup>I</sup>-catalyzed cyclooligomerization of dipeptide **16** gave cyclic dimer pseudo-tetrapeptide **4** as the major isolated product in good efficiency (67%). The effects of reaction conditions including solvent, Cu(I) source, and base as well as addition of reducing agents and Cu(I)-stabilizing ligand were investigated for these reactions. The highest conversion and purity for compounds **2** and **4** were obtained using 1 mM peptide in MeCN, DIEA (2 eq), 2,6-lutidine (2 eq), and CuI (2 eq). While such reactions also proceeded with catalytic CuI, the addition of two equivalents was required to ensure full conversion within a reasonable timeframe (12 hours). Compound **3** was synthesized to confirm that non-symmetric bis-triazole tetrapeptides could be prepared by mixing equimolar amounts of two different azido/alkyne-terminated dipeptide substrates. Indeed, a mixture of dipeptides **14** and **15** gave the cyclic heterodimer **3** in a yield that, while modest, is nevertheless impressive considering the simplicity of the azide-alkyne dipeptide starting materials.

To explore the possibility of constructing triazole-modified cyclic tetrapeptides bearing side chains at each of the four

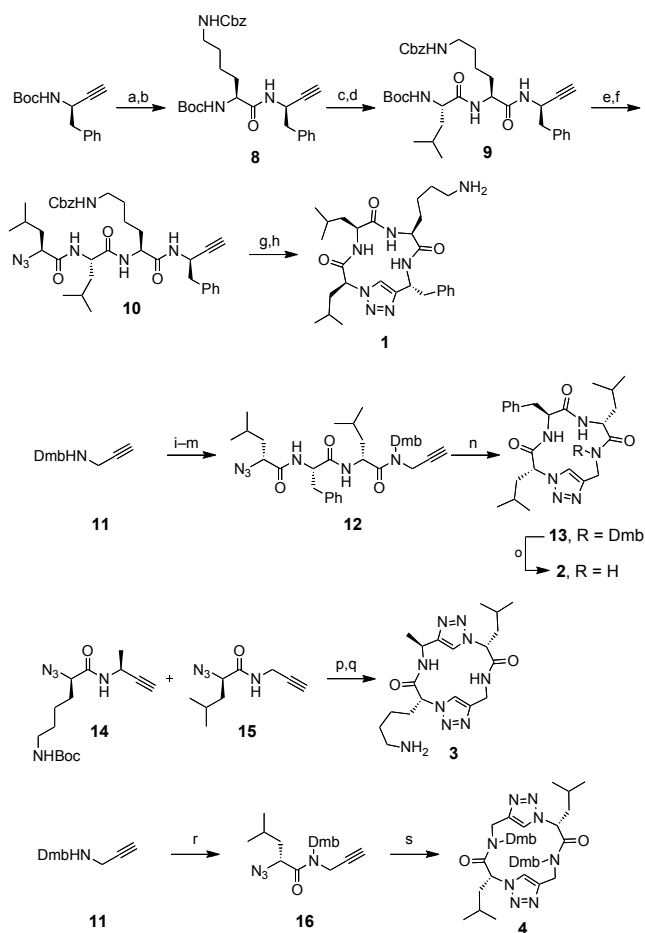

**Scheme S1.** Reagents and conditions: (a) TFA; (b) Boc-Lys(Cbz), HBTU, DIEA (83%, two steps); (c) TFA; (d) Boc-Leu, HBTU, DIEA (70%, two steps); (e) TFA; (f) N<sub>3</sub>-Leu, EDC·HCl, HOBT, DIEA, 0 °C (36%, two steps); (g) CuI, 2,6-lutidine, DIEA, TBTA; (h) TFA, TMSOTf, *m*-cresol (55%, two steps); (i) Boc-D-Leu, HBTU, DIEA; (j) TFA; (k) Boc-Phe, HBTU, DIEA; (l) TFA; (m) N<sub>3</sub>-D-Leu, HATU, DIEA, 0 °C; (n) CuI, 2,6-lutidine, DIEA (23%); (o) TFA, TMSOTf, anisole (quant); (p) CuI, 2,6-lutidine, DIEA; (q) TFA (8%, two steps); (r) N<sub>3</sub>-D-Leu, HATU, DIEA, 0 °C (66%); (s) CuI, 2,6-lutidine, DIEA (66%).

stereogenic carbons in the backbone, we set out to prepare compound **1**. Boc-D-Phe was converted to the chiral propargylamine using a reported procedure,<sup>S3</sup> deprotected, and coupled to Boc-Lys(Cbz) to give dipeptide **8**. Sequential peptide extension with Boc-Leu and then N<sub>3</sub>-Leu yielded linear tetrapeptide **10**. Attempts to cyclize **10** using conditions as described above for compounds **2** and **4** gave negligible quantities of the desired product, instead leading to the predominant formation of the cyclic pseudo-octapeptide. We found that addition of the Cu(I) ligand TBTA to the reaction favored the cyclic tetrapeptide as the major product and consequently greatly improved the yield of **1**. Following cleavage of the lysine side chain Cbz protecting group, cyclic tetrapeptide **1** was isolated in 55 % yield (over two steps from **10**).

Taken together, the syntheses of compounds **1–4** highlight the generality of azide-alkyne cycloaddition for preparing cyclic pseudo-tetrapeptides.

S1.) Chan, T.R.; Hilgraf, R.; Sharpless, K.B.; Fokin, V.V. *Org. Lett.* **2004**, *6*(17), 2853.

S2.) van Maarseveen, J. H.; Horne, W. S.; Ghadiri, M. R. *Org. Lett.* **2005**, *7*, 4503.

S3.) Corey, E. J.; Fuchs, P. L. *Tetrahedron Lett.* **1972**, 3769.

**General procedure for Cu-mediated peptide cyclization for compounds 2 and 4:** The azido-alkyne terminated peptide (1 eq.) was dissolved in acetonitrile to a concentration of 1 mM. The solution was degassed by Ar bubbling for 20 minutes. Diisopropylethylamine (2 eq.), 2,6-lutidine (2 eq.), and CuI (2 eq.) were added sequentially. The reaction was stirred for 12 hr at room temperature under Ar. The reaction mixture was then concentrated to a residue and purified by preparative RP-HPLC. Residual water and TFA from the preparative HPLC were removed by solvent exchange with acetonitrile (x3) followed by CHCl<sub>3</sub> (x3).

**Dipeptide 8:** Boc-D-Phe-alkyne was prepared in four steps from Boc-D-Phe as described in the literature for the L-enantiomer.<sup>S4</sup> To remove the Boc group, this alkyne (140 mg, 0.571 mmol) was dissolved in 1:1 TFA / CH<sub>2</sub>Cl<sub>2</sub> (6 mL). The reaction was allowed to stand for 30 min at room temperature. The solution was concentrated, and the resulting residue exchanged with CHCl<sub>3</sub> (x3) and dried under high vacuum. In a second flask, Boc-Lys(Cbz)-OH (261 mg, 0.685 mmol) and HBTU (238 mg, 0.628 mmol) were dissolved in DMF (10 mL). Diisopropylethylamine (300  $\mu$ L, 1.72 mmol) was added, and the solution stirred at room temperature for 10 min. A solution of the crude deprotected Phe alkyne from above in DMF (2 mL) with diisopropylethylamine (100  $\mu$ L, 0.574 mmol) was then added. The reaction was allowed to stir at room temperature for 3 hr. The solution was concentrated under high vacuum, redissolved in EtOAc, and washed successively with 5% aq. NaHCO<sub>3</sub> (x2), 5% aq. KHSO<sub>4</sub> (x2), and satd. NH<sub>4</sub>Cl. The organic layer was dried with MgSO<sub>4</sub>, concentrated, purified by silica column eluted with 1:1 hexanes / EtOAc to yield 240 mg (83%) of the product as a gummy solid. <sup>1</sup>H NMR (600 MHz, DMSO-d<sub>6</sub>)  $\delta$  8.31 (d, *J* = 8 Hz, 1H), 7.35-7.15 (overlapping m, 10 H), 6.67 (d, *J* = 8 Hz, 1H), 4.99 (s, 2H), 4.70 (m, 1H), 3.83 (m, 1H), 3.23 (d, *J* = 2 Hz, 1H), 2.95-2.80 (overlapping m, 4H), 1.35 (s, 9H), 1.29 (m, 4H), 1.07 (m, 2H); <sup>13</sup>C NMR (150 MHz, MeOD)  $\delta$  173.7, 158.7, 157.4, 138.3, 138.0, 130.5, 129.3, 129.2, 128.8, 128.7, 127.7, 80.3, 73.1, 67.2, 55.5, 43.3, 42.4, 41.4, 41.3, 33.1, 30.3, 28.7, 23.6; HRMS (m/z) [M+H]<sup>+</sup> obsd. = 508.2812 (calc. = 508.2806).

**Tripeptide 9:** Linear dipeptide 8 (235 mg, 0.462 mmol) was dissolved in 1:1 TFA / CH<sub>2</sub>Cl<sub>2</sub> (6 mL). The reaction was allowed to stand for 30 min at room temperature. The solution was concentrated, and the resulting residue exchanged with CHCl<sub>3</sub> (3 $\times$ ) and dried under high vacuum. In a second flask, Boc-Leu-OH-H<sub>2</sub>O (138 mg, 0.554 mmol) and HBTU (193 mg, 0.508 mmol) were dissolved in DMF (10 mL). Diisopropylethylamine (240  $\mu$ L, 1.38 mmol) was added, and the solution stirred at room temperature for 10 min. A solution of the crude deprotected dipeptide alkyne 8 from above in DMF (2 mL) with diisopropylethylamine (82  $\mu$ L, 0.470 mmol) was then added. The reaction was allowed to stir at room temperature for 3 hr. The solution was concentrated under high vacuum, redissolved in EtOAc, and washed successively with 5% aq. NaHCO<sub>3</sub> (2 $\times$ ), 5% aq. KHSO<sub>4</sub> (x2), and satd. NH<sub>4</sub>Cl. The organic layer was dried with MgSO<sub>4</sub>, concentrated, purified by silica column eluted with 1:2 hexanes / EtOAc to yield 198 mg (70%) of the product as a gummy solid. <sup>1</sup>H NMR (500 MHz, DMSO-d<sub>6</sub>)  $\delta$  8.45 (d, *J* = 8 Hz, 1H), 7.58 (d, *J* = 8 Hz, 1H), 7.4-7.1 (overlapping m, 11H), 6.92 (d, *J* = 8 Hz, 1H), 4.98 (s, 2H), 4.70 (m, 1H), 4.17 (m, 1H), 3.92 (m, 1H), 3.21 (d, *J* = 3 Hz, 1H), 2.9-2.8 (m, 4H), 1.56 (m, 1H), 1.4-1.2 (m, 15H), 1.00 (m, 2H), 0.84 (d, *J* = 7 Hz, 3H), 0.82 (d, *J* = 7 Hz,

3H); <sup>13</sup>C NMR (150 MHz, CDCl<sub>3</sub>)  $\delta$  173.0, 170.3, 156.5, 155.8, 136.5, 136.2, 129.5, 129.5, 128.4, 128.2, 128.0, 128.0, 126.8, 82.4, 80.1, 72.0, 66.5, 53.2, 52.6, 42.3, 41.3, 41.0, 40.3, 31.4, 29.6, 29.2, 28.2, 28.2, 24.6, 22.9, 22.1, 21.7; HRMS (m/z) [M+H]<sup>+</sup> obsd. = 621.3656 (calc. = 621.3646).

**Linear tetrapeptide 10:** Peptide 9 (192 mg, 0.309 mmol) was dissolved in 1:1 TFA / CH<sub>2</sub>Cl<sub>2</sub> (6 mL). The reaction was allowed to stand for 30 min at room temperature. The solution was concentrated, and the resulting residue exchanged with CHCl<sub>3</sub> (x3) and dried under high vacuum. The crude residue was dissolved in CH<sub>2</sub>Cl<sub>2</sub> (10 mL). Diisopropylethylamine (215  $\mu$ L, 1.236 mmol), HOBT-H<sub>2</sub>O (52 mg, 0.340 mmol), and N<sub>3</sub>-L-Leu<sup>S5</sup> (53 mg, 0.340 mmol) were added. The solution was cooled to 0°C and EDC-HCl (65 mg, 0.340 mmol) was added. The solution was stirred at 0°C for 1 hr then at room temperature for 2 hr. The reaction was then diluted with EtOAc, and washed successively with 5% aq. KHSO<sub>4</sub> (x3), 5% aq. NaHCO<sub>3</sub> (x3), and satd. NH<sub>4</sub>Cl. The organic layer was dried with MgSO<sub>4</sub>, concentrated, and purified by silica column eluted with 1:2 hexanes / EtOAc to yield 74 mg (36%) of the product as a gummy solid. <sup>1</sup>H NMR (600 MHz, DMSO-d<sub>6</sub>)  $\delta$  8.41 (d, *J* = 8 Hz, 1H), 8.33 (d, *J* = 8 Hz, 1H), 7.90 (d, *J* = 8 Hz, 1H), 7.35-7.15 (overlapping m, 10H), 4.98 (s, 2H), 4.70 (m, 1H), 4.34 (dd, *J* = 16, 8 Hz, 1H), 4.12 (m, 1H), 3.75 (t, *J* = 7 Hz, 1H), 3.22 (d, *J* = 2 Hz, 1H), 2.95-2.80 (m, 4H), 1.60-1.20 (m, 10H), 1.02 (m, 2H), 0.95-0.80 (overlapping d, 12H); <sup>13</sup>C NMR (150 MHz, CDCl<sub>3</sub>)  $\delta$  172.1, 170.3, 170.1, 156.6, 136.5, 136.1, 129.5, 128.4, 128.3, 128.0, 126.9, 72.0, 66.6, 62.6, 62.3, 52.7, 51.5, 42.2, 41.6, 41.4, 41.1, 40.9, 40.2, 31.5, 29.3, 24.9, 24.7, 23.0, 22.9, 22.1, 21.9, 21.6; HRMS (m/z) [M+H]<sup>+</sup> obsd. = 660.3869 (calc. = 660.3868).

**Cyclic peptide 1:** Linear azido-alkyne terminated peptide 10 (30 mg, 45  $\mu$ mol) was dissolved in acetonitrile (230 mL) and the solution degassed by bubbling Ar for 15 min. To this solution were sequentially added diisopropylethylamine (16  $\mu$ L, 91  $\mu$ mol), 2,6-lutidine (11  $\mu$ L, 91  $\mu$ mol), *tris*-(benzyltriazolylmethyl)-amine (48 mg, 91  $\mu$ mol), and CuI (17 mg, 91  $\mu$ mol). The reaction was stirred at room temperature under an Ar atmosphere for 3 days. The reaction was then concentrated to a residue and treated with TFA / TMSOTf / *m*-cresol (2 mL of an 8:1:1 solution by volume). After 30 min at room temperature, the suspension was diluted with Et<sub>2</sub>O (45 mL) and centrifuged. The supernatant was discarded, and the solid pellet dried under vacuum. Purification by preparative HPLC on a C<sub>18</sub> column yielded 16 mg (55% assuming a salt with one molecule of trifluoroacetate per peptide) of the product as a white solid. <sup>1</sup>H NMR (600 MHz, DMSO-d<sub>6</sub>)  $\delta$  8.62 (d, *J* = 10 Hz, 1H), 7.97 (s, 1H), 7.89 (d, *J* = 10 Hz, 1H), 7.59 (br s, 3H), 7.31 (d, *J* = 7 Hz, 2H), 7.27 (t, *J* = 7 Hz, 2H), 7.25 (d, *J* = 8 Hz, 1H), 7.18 (t, *J* = 7 Hz, 1H), 5.25 (m, 1H), 5.09 (t, *J* = 8 Hz, 1H), 4.28 (m, 1H), 4.02 (dd, *J* = 16, 8 Hz, 1H), 3.34 (dd, *J* = 14, 6 Hz, 1H), 3.12 (dd, *J* = 14, 10 Hz, 1H), 2.69 (br t, *J* = 7 Hz, 2H), 2.22 (m, 1H), 1.99 (m, 1H), 1.60-1.30 (m, 8H), 1.16-1.02 (m, 2H), 0.96 (d, *J* = 4 Hz, 3H), 0.95 (d, *J* = 4 Hz, 3H), 0.89 (d, *J* = 7 Hz, 3H), 0.82 (d, *J* = 7 Hz, 3H); <sup>13</sup>C NMR (150 MHz, CDCl<sub>3</sub>)  $\delta$  170.98, 170.95, 166.8, 150.8, 138.6, 129.2, 128.8, 128.1, 126.2, 65.3, 54.0, 52.7, 48.4, 38.6, 37.2, 26.8, 24.9, 24.7, 22.7, 22.2, 22.1, 22.0, 21.4, 36.2, 30.6; HRMS (m/z) [M+H]<sup>+</sup> obsd. = 526.3508 (calc. = 526.3500).

**Dmb-propargylamine hydrochloride 11:** Propargylamine (1.0 g, 18.1 mmol) and 2,4-dimethoxy benzaldehyde (2.5 g, 15.1 mmol) were dissolved in dry methanol (50 mL) and stirred for 2

S4.) Reginato, G.; Mordini, A.; Messina, F.; DeglInnocenti, A.; Poli, G. *Tetrahedron* **1996**, *52* 10985.

S5.) Lundquist, J. T. I. V.; Pelletier, J. C., *Org. Lett.* **2001**, *3*, 781-783.

hr. To the resulting clear solution sodium borohydride (1.0 g, 27.0 mmol) was carefully added portionwise. The suspension was stirred for 2 hr. After dilution with ether (100 mL), 2 M NaOH (20 mL) was added to quench the reaction. The reaction mixture was transferred to a separation funnel and the organic layer was washed with water (x2) and dried (brine and MgSO<sub>4</sub>). After filtration the volatiles were evaporated under vacuum and the sticky residue was dissolved in methanol (25 mL). To this 12 M HCl (2 mL) was added, and the volatiles were removed under reduced pressure. The residue was dissolved in 1:4 MeOH / EtOAc (40 mL) followed by saturation with hexanes (in the case no crystallization occurs additional ether may be added). The resulting crystals were collected by filtration and dried to give the product (2.3 g, 55%) as its HCl salt. <sup>1</sup>H NMR (500 MHz, CD<sub>3</sub>OD) δ 7.30 (d, *J* = 8 Hz, 1H), 6.64 (d, *J* = 2 Hz, 1H), 6.58 (dd, *J* = 8, 2 Hz, 1H), 4.23 (s, 2H), 3.91 (s, 3H), 3.90 (d, *J* = 3 Hz, 2H), 3.83 (s, 3H), 3.27 (t, *J* = 3 Hz, 1H); <sup>13</sup>C NMR (100 MHz, DMSO-*d*<sub>6</sub>) δ 161.5, 158.7, 132.5, 111.4, 104.8, 98.2, 79.4, 74.9, 55.6, 55.3, 43.4, 35.0; ESI-MS (*m/z*) [*M*+H]<sup>+</sup> obsd. = 206.1 (calc. = 206.1).

**General procedure for solution-phase peptide synthesis used to prepare 12 and 15:** Couplings were carried out as follows: to a stirred solution of carboxylic acid component (1.1 eq.) in 4:1 CH<sub>2</sub>Cl<sub>2</sub> / DMF at a concentration ~0.4 M was added DIEA (2.2 eq.). The solution was cooled to 0 °C and HATU or HBTU (1 eq.) was added in one portion. After 10 minutes at 0 °C, a solution of the amine component (1 eq.) in DMF at a concentration of ~0.5 M was added. The reactions were typically stirred for 3 hr at 0 °C. Work-up was accomplished by diluting the reaction mixture with EtOAc followed by successive washing with 0.5 M KHSO<sub>4</sub> (x3) and brine. After drying with MgSO<sub>4</sub> and filtration, the solvents were removed under vacuum and the residue was purified by flash chromatography. Fmoc deprotections were carried out by dissolving the peptide in 2:1 acetonitrile / diethylamine and stirring for 1 h. After concentration of the solution under vacuum, the residue was exchanged with acetonitrile and used directly in the subsequent coupling step.

**Protected linear tetrapeptide 12:** Prepared from secondary amine 11, Fmoc-D-Leu, Fmoc-Phe, and N<sub>3</sub>-D-Leu by the general solution phase peptide synthesis conditions described above. Due to complexity arising from *cis-trans* isomerization about tertiary amide, the <sup>1</sup>H NMR was not assigned. The full spectrum can be found in Figure S2. <sup>1</sup>H NMR (400 MHz, CDCl<sub>3</sub>) see Figure S2; <sup>13</sup>C NMR (150 MHz, CDCl<sub>3</sub>) δ 171.81, 171.07, 169.89, 169.64, 169.58, 161.16, 160.53, 158.85, 136.25, 136.21, 130.84, 130.50, 129.19, 128.65, 127.08, 116.54, 115.14, 104.14, 103.84, 98.62, 98.35, 78.59, 78.45, 72.68, 71.80, 62.64, 55.35, 55.29, 55.23, 55.16, 54.47, 54.36, 47.93, 47.85, 45.39, 43.75, 42.90, 42.05, 41.02, 41.05, 38.84, 38.78, 36.52, 33.22, 24.90, 24.51, 24.47, 23.47, 23.39, 22.90, 22.87, 21.48, 21.47, 21.43; HRMS (*m/z*) [*M*+Na]<sup>+</sup> obsd. = 627.3254 (calc. = 627.3265).

**Protected cyclic peptide 13:** Prepared from azide-alkyne tetrapeptide 12 (61 mg, 0.10 mmol) by the general Cu-mediated cyclization procedure as described above. Purification by preparative RP-HPLC yielded 14 mg (23%) of the product. Due to complexity arising from *cis-trans* isomerization about tertiary amide, the <sup>1</sup>H NMR was not assigned. The full spectrum can be found in Figure S2. <sup>1</sup>H NMR (600 MHz, CDCl<sub>3</sub>) see Figure S2; <sup>13</sup>C NMR (150 MHz, CDCl<sub>3</sub>) δ 172.2, 170.1, 167.7, 161.0, 158.8, 135.8, 130.7, 129.0, 128.9, 128.5, 128.4, 126.9, 116.8, 103.7, 98.8, 62.5, 55.4, 55.3, 54.8, 48.1, 47.5, 41.8, 38.2, 37.7, 36.8, 24.6, 24.3, 22.9, 22.6, 21.8, 21.6; HRMS (*m/z*) [*M*+H]<sup>+</sup> obsd. = 605.3447 (calc. = 605.3446).

**Cyclic peptide 2:** Prepared by dissolving peptide 13 in 8:1:1 by volume TFA / trimethylsilyltrifluoromethanesulfonate (TMSOTf) / anisole to a concentration of ~0.2 M. The mixture was allowed to stand at room temperature for 30 min. The product was precipitated by addition of cold ether. The suspension was centrifuged, the supernatant discarded, and the resulting solid washed with ether (x3). Drying the resulting pellet under high vacuum gave 2 in quantitative yield. <sup>1</sup>H NMR (600 MHz) δ 8.34 (d, *J* = 10 Hz, 1H), 8.19 (overlapping d, 2H), 7.47 (s, 1H), 7.21 (m, 2H), 7.15 (m, 3H), 5.24 (t, *J* = 7 Hz, 1H), 4.57 (dd, *J* = 18, 8 Hz, 1H), 4.53 (dd, *J* = 14, 8 Hz, 1H), 4.14 (dd, *J* = 15, 9 Hz, 1H), 3.85 (dd, *J* = 15, 4 Hz, 1H), 2.83 (dd, *J* = 14, 8 Hz, 1H), 2.74 (dd, *J* = 14, 8 Hz, 1H), 1.91 (m, 2H), 1.44 (m, 1H), 1.33 (m, 2H), 1.23 (m, 1H), 0.89 (d, *J* = 7 Hz, 3H), 0.86 (d, *J* = 7 Hz, 3H), 0.77 (d, *J* = 7 Hz, 3H), 0.68 (d, *J* = 7 Hz, 3H); <sup>13</sup>C NMR (150 MHz, DMSO-*d*<sub>6</sub>) δ 171.0, 169.3, 166.9, 147.2, 137.1, 128.9, 127.9, 126.2, 61.5, 53.9, 51.1, 37.8, 36.9, 36.4, 34.9, 24.4, 23.8, 22.4, 22.2, 22.0, 22.0; HRMS (*m/z*) [*M*+H]<sup>+</sup> obsd. = 455.2754 (calc. = 455.2765).

**Dipeptide 14:** Boc-Ala-alkyne (130 mg, 0.768 mmol), prepared according to a literature procedure,<sup>S4</sup> was dissolved in 1:1 TFA / CH<sub>2</sub>Cl<sub>2</sub> (10 mL). The reaction was allowed to stand for 20 min at room temperature and concentrated. The resulting residue was exchanged with CHCl<sub>3</sub> (x3) and used directly in the next step. The crude amino alkyne from above, diisopropylethylamine (534 μL, 3.07 mmol), N<sub>3</sub>-D-Lys(Boc)<sup>S5</sup> (230 mg, 0.845 mmol), and HOBT·H<sub>2</sub>O (129 mg, 0.845 mmol) were dissolved in CH<sub>2</sub>Cl<sub>2</sub> (20 mL). The solution was cooled to 0°C and EDC·HCl (162 mg, 0.845 mmol) was added at once. After stirring for 1 hr at 0°C and 2 hr at room temperature, the reaction was concentrated, diluted with EtOAc (150 mL), and washed successively with 5% aq. NaHCO<sub>3</sub> (x2), 5% aq. KHSO<sub>4</sub> (x2), and brine. The organic layer was dried with MgSO<sub>4</sub>, concentrated, and purified by flash chromatography (1:1 hexanes / EtOAc) to yield 197 mg (79%) of the product as a white solid. <sup>1</sup>H NMR (500 MHz, CDCl<sub>3</sub>) δ 6.61 (d, *J* = 8 Hz, 1H), 4.75 (m, 1H), 4.61 (br s, 1H), 3.95 (dd, *J* = 7, 5 Hz, 1H), 3.10 (m, 2H), 2.27 (d, *J* = 2 Hz, 1H), 1.95-1.81 (m, 2H), 1.55-1.35 (m, 16H); <sup>13</sup>C NMR (125 MHz, CDCl<sub>3</sub>) δ 168.2, 155.9, 83.5, 70.7, 63.8, 40.1, 36.9, 31.6, 29.5, 28.3, 22.3, 21.9; HRMS (*m/z*) [*M*+Na]<sup>+</sup> obsd. = 346.1848 (calc = 346.1849).

**Dipeptide 15:** N<sub>3</sub>-D-Leu, prepared from D-Leu as previously described for the L-enantiomer,<sup>S5</sup> (300 mg, 1.91 mmol) and propargylamine (72 μL, 1.91 mmol) were reacted according to the general HATU coupling procedure outlined above to yield 253 mg (68%) of the product. <sup>1</sup>H NMR (400 MHz, CDCl<sub>3</sub>) δ 6.57 (br s, 1H), 4.03 (m, 2H), 3.95 (dd, *J* = 9, 4 Hz, 1H), 2.23 (t, *J* = 3 Hz, 1H), 1.90-1.60 (m, 3H), 0.95 (dd, *J* = 6, 4 Hz, 6H); <sup>13</sup>C NMR (100 MHz, CDCl<sub>3</sub>) δ 169.6, 78.8, 71.9, 62.7, 41.1, 29.1, 24.9, 22.9, 21.4; HRMS (*m/z*) [*M*-H]<sup>-</sup> obsd. = 193.1090 (calc. = 193.1095).

**Cyclic tetrapeptide 3:** Dipeptide 14 (16 mg, 0.05 mmol) and dipeptide 15 (10 mg, 0.05 mmol) were dissolved in acetonitrile (100 mL). The solution was degassed by Ar bubbling for 20 min, after which diisopropylethylamine (35 μL, 0.2 mmol), 2,6-lutidine (23 μL, 0.2 mmol), and CuI (38 mg, 0.2 mmol) were added. The reaction was stirred at room temperature under Ar for 24 hr and then concentrated under vacuum. The resulting residue was suspended in 1:1 TFA / CHCl<sub>3</sub> (10 mL), allowed to stand for 30 min, and then concentrated under vacuum. Purification by preparative RP-HPLC yielded 2 mg (8% assuming a salt with 2 eq. of TFA) of the product as a white solid. <sup>1</sup>H NMR (600 MHz, DMSO-*d*<sub>6</sub>) δ 9.07 (dd, *J* = 7, 5 Hz, 1H), 8.91 (d, *J* = 8 Hz, 1H), 7.64 (br s, 3H), 7.29 (s, 1H), 7.24 (s, 1H), 5.12 (t, *J* = 8 Hz, 1H),

5.00 (m, 2H), 4.53 (dd,  $J = 14, 7$  Hz, 1H), 3.88 (dd,  $J = 14, 5$  Hz, 1H), 2.76 (m, 2H), 2.04 (m, 1H), 1.98-1.86 (m, 3H), 1.53 (m, 2H), 1.48 (d,  $J = 7$  Hz, 3H), 1.39 (m, 1H), 1.30-1.15 (m, 2H), 0.91 (d,  $J = 7$  Hz, 3H), 0.88 (d,  $J = 7$  Hz, 3H);  $^{13}\text{C}$  NMR (150 MHz, DMSO- $d_6$ )  $\delta$  167.5, 166.2, 148.9, 145.2, 120.1, 119.2, 62.6, 61.5, 41.1, 38.5, 37.9, 34.4, 29.6, 26.6, 24.3, 22.1, 22.0, 16.8; HRMS ( $m/z$ ) [ $\text{M}+\text{H}$ ] $^+$  obsd. = 418.2683 (calc. = 418.2673).

**Protected dipeptide 16:** To a stirred solution of  $\text{N}_3\text{-D-Leu}^{55}$  (0.325 g, 2.07 mmol) in 4:1  $\text{CH}_2\text{Cl}_2$  / DMF (5 mL) was added DIEA (0.721 mL, 4.14 mmol). The solution was cooled to 0 °C and HATU (780 mg, 2.05 mmol) was added in one portion. After 10 minutes, a solution of *N*-(2,4-dimethoxybenzyl)-propargylamine hydrochloride **11** (0.50 g, 2.07 mmol) and DIEA (0.360 mL, 2.01 mmol) dissolved in DMF (3 mL) was added, and the reaction was stirred for 3 hours at 0 °C. Work-up was accomplished by diluting the reaction mixture with EtOAc followed by washing sequentially with 0.2 M  $\text{KHSO}_4$  (x3) and brine. After drying with  $\text{MgSO}_4$  and filtration, the solvent was removed under vacuum and the residue was purified by flash chromatography (1:1 EtOAc / hexanes) to give the 468 mg (66 %) of the product as a viscous oil. Ratio of integration in  $^1\text{H}$  NMR indicates a 70:30 mixture of two conformers likely resulting from *cis-trans* rotamers about the tertiary amide bond. In regions where the two conformations are well separated, resonances are assigned partial proton integration for each.  $^1\text{H}$  NMR (400 MHz,  $\text{CDCl}_3$ )  $\delta$  7.17 (d,  $J = 8$  Hz, 0.3 H), 7.06 (d,  $J = 9$  Hz, 0.7 H), 6.50-6.40 (m, 2H), 4.70-4.30 (overlapping d, 2.6H), 4.11 (dd,  $J = 10, 4$  Hz, 0.7H), 4.06 (dd,  $J = 19, 3$  Hz, 0.3 H), 4.0-3.8 (overlapping m, 1.4H), 3.78 (overlapping s, 6H), 2.25 (t,  $J = 3$  Hz, 0.3H), 2.20 (t,  $J = 3$  Hz, 0.7H), 2.0-1.5 (overlapping m, 3H), 1.0-0.8 (overlapping d, 6H);  $^{13}\text{C}$  NMR (125 MHz,  $\text{CDCl}_3$ )  $\delta$  170.57, 169.75, 160.94, 160.51, 158.63, 158.33, 131.19, 129.57, 116.54, 115.29, 104.10, 103.86, 98.56, 98.19, 78.47, 72.51, 71.90, 56.93, 56.68, 55.22, 55.13, 45.44, 43.79, 39.46, 39.12, 36.19, 33.75, 24.92, 22.92, 22.75, 21.66, 21.36; HRMS ( $m/z$ ) [ $\text{M}+\text{H}$ ] $^+$  obsd. = 345.1808 (calc. = 345.1921).

**Protected cyclic peptide 4:** Prepared from azide-alkyne dipeptide **16** (103 mg, 0.30 mmol) by the general Cu-mediated cyclization procedure as described above. Purification by preparative RP-HPLC yielded 68 mg (66%) of the product.  $^1\text{H}$  NMR (500 MHz,  $\text{CDCl}_3$ )  $\delta$  7.70 (s, 2H), 7.25 (d,  $J = 8$  Hz, 2H), 6.50-6.45 (overlapping s and dd, 4H), 6.0 (dd,  $J = 9, 6$  Hz, 2H), 5.06 (d,  $J = 15$  Hz, 2H), 4.82 (d,  $J = 15$  Hz, 2H), 3.88 (d,  $J = 15$  Hz, 2H), 3.83 (s, 6H), 3.80 (s, 6H), 3.88 (d,  $J = 15$  Hz, 2H), 2.12 (m, 2H), 1.95 (m, 2H), 1.41 (m, 2H), 0.98 (d,  $J = 7$  Hz, 6H), 0.84 (d,  $J = 7$  Hz, 6H);  $^{13}\text{C}$  NMR (125 MHz,  $\text{CDCl}_3$ )  $\delta$  167.3, 161.3, 159.0, 143.8, 131.4, 121.1, 115.8, 103.9, 99.1, 58.4, 55.4, 46.5, 40.1, 39.9, 24.6, 22.7, 22.0; HRMS ( $m/z$ ) [ $\text{M}+\text{H}$ ] $^+$  obsd. = 689.3754 (calc. = 689.3769).

### 3. Synthesis and characterization of peptides 7a–7h and *ent-7a–ent-7h*.

The threonine-derived alkyne<sup>56</sup> and the phenylalanine-derived azide<sup>55</sup> were synthesized as described in the literature. Some racemization was observed in the preparation of the threonine-derived alkyne (varying between 7% and 12%). Alternative preparation of the threonine-derived alkyne via Corey-

Fuchs homologation<sup>53</sup> avoids this racemization, but the overall yield of the alkyne was significantly reduced. The stereochemistry assigned to the molecules below refers to that of the parent amino acid. We note in the case of Thr that, following homologation, the assigned stereochemistry changes although no inversion of the stereocenter takes place.

**General procedure for azido esters (17a–d).** Methyl ester protected amino acid (1.77 mmol, 1.2 eq) was dissolved in DCM (10 mL) and diisopropylethylamine (DIEA) was added (4.32 mmol, 3.0 eq). The reaction mixture was cooled to 0 °C (15 min) followed by addition of EDC (1.58 mmol, 1.1 eq), HOBt (1.58 mmol, 1.1eq), and the azido acid (1.44mmol, 1 eq) in that order. The reaction was allowed to run at 0 °C for 30 min at which time the reaction was allowed to warm to RT. After 2.5 h at RT the reaction mixture was transferred to a separation funnel using DCM (40 mL), and the organic layer was extracted once each with 5%  $\text{KHSO}_4$  (aq, 30 mL), 5%  $\text{NaHCO}_3$  (aq, 30 mL),  $\text{H}_2\text{O}$  (30 mL) and brine (30 mL). The organic layer was then dried with  $\text{MgSO}_4$ , filtered, and concentrated under vacuum. The resulting crude product was purified by flash chromatography using EtOAc:hexanes (1:1) as eluent. The eluent was removed under vacuum to leave a clear, colorless oil which was subsequently dissolved in  $\text{CHCl}_3$  and evaporated under vacuum (x3) to yield a white solid.

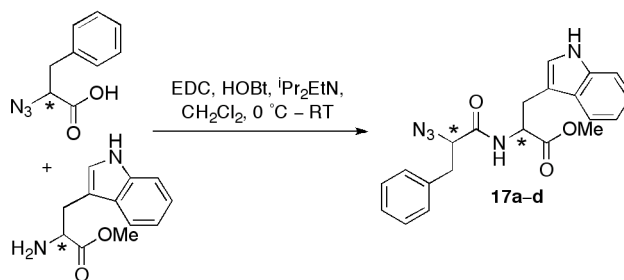

**$\text{N}_3\text{-L-Phe-L-Trp-OMe}$  (17a).** White solid (529 mg, 92%).  $^1\text{H}$  NMR (400 MHz, DMSO- $d_6$ )  $\delta$ : 10.89 (s, 1H), 8.68 (d,  $J = 8$  Hz, 1H), 7.48 (d,  $J = 8$  Hz, 1H), 7.34-7.27 (m, 3H), 7.24-7.22 (m, 3H), 7.10 (d,  $J = 2$  Hz, 1H), 7.06 (t,  $J = 15, 7$  Hz, 1H), 6.98 (t,  $J = 15, 7$  Hz, 1H), 4.59-4.54 (m, 1H), 4.05-4.02 (m, 1H), 3.58 (s, 3H), 3.20-3.05 (m, 2H), 3.06-2.84 (m, 2H) ppm.  $^{13}\text{C}$  NMR (125 MHz,  $\text{CDCl}_3$ )  $\delta$ : 171.6, 168.0, 136.0, 135.9, 129.6, 128.7, 127.3, 127.2, 122.7, 122.3, 119.6, 118.5, 111.2, 109.5, 65.1, 52.6, 52.4, 38.1, 27.6 ppm. ESI-TOF ( $m/z$ ) [ $\text{M}+\text{Na}$ ] $^+$  obsd. = 414.1540 (calc. = 414.1537).

**$\text{N}_3\text{-L-Phe-D-Trp-OMe}$  (17b).** White solid (547 mg, 95%).  $^1\text{H}$  NMR (500 MHz, DMSO- $d_6$ )  $\delta$ : 10.80 (s, 1H), 8.66 (d,  $J = 8$  MHz, 1H), 7.47 (d,  $J = 8$  MHz, 1H), 7.31 (d,  $J = 8$  Hz, 1H), 7.27-7.21 (m, 3H), 7.16-7.15 (m, 2H), 7.05 (t,  $J = 15, 7$  Hz, 1H), 7.02 (d,  $J = 2$  Hz, 1H), 6.98 (t,  $J = 15, 7$  Hz, 1H), 4.57-4.53 (m, 1H), 4.04-4.01 (m, 1H), 3.60 (s, 3H), 3.13-2.99 (m, 2H), 2.89-2.76 (m, 2H) ppm.  $^{13}\text{C}$  NMR (125 MHz,  $\text{CDCl}_3$ )  $\delta$ : 171.5, 168.5, 136.0, 135.9, 129.1, 128.4, 127.1, 126.9, 122.8, 122.0, 119.3, 118.1, 111.3, 109.0, 65.0, 52.9, 52.2, 38.2, 27.3 ppm. ESI-TOF ( $m/z$ ) [ $\text{M}+\text{Na}$ ] $^+$  obsd. = 414.1539 (calc. = 414.1537).

**$\text{N}_3\text{-D-Phe-L-Trp-OMe}$  (17c).** White solid (541 mg, 94%).  $^1\text{H}$  NMR (400 MHz, DMSO- $d_6$ )  $\delta$ : 10.85 (s, 1H), 8.67 (d,  $J = 8$  Hz, 1H), 7.46 (d,  $J = 8$  Hz, 1H), 7.31 (d,  $J = 8$  Hz, 1H), 7.27-7.19 (m, 3H), 7.16-7.14 (m, 2H), 7.07 (t,  $J = 15, 7$  Hz, 1H), 7.01 (d,  $J = 2$  Hz, 1H), 6.99 (t,  $J = 15, 7$  Hz, 1H), 4.58-4.52 (m, 1H), 4.03-4.00 (m, 1H), 3.60 (s, 3H), 3.13-2.97 (m, 2H), 2.89-2.75 (m, 2H) ppm.

S6.) Roth, G.J.; Liepold, B.; Muller, S.G.; Bestmann, H.J. *Synthesis*. **2004**, *1*, 59.

$^{13}\text{C}$  NMR (150 MHz,  $\text{CDCl}_3$ )  $\delta$ : 171.5, 168.5, 136.1, 136.0, 129.3, 128.6, 127.3, 127.1, 122.7, 122.2, 119.5, 118.3, 111.3, 109.4, 65.4, 53.9, 53.4, 39.5, 27.4 ppm. ESI-TOF ( $m/z$ )  $[\text{M}+\text{H}]^+$  obsd. = 392.1713 (calc. = 392.1717).

**$\text{N}_3$ -D-Phe-D-Trp-OMe (17d)**. White solid (540 mg, 94%).  $^1\text{H}$  NMR (500 MHz,  $\text{DMSO}-d_6$ )  $\delta$ : 10.88 (s, 1H), 8.67 (d,  $J = 8$  Hz, 1H), 7.47 (d,  $J = 8$  Hz, 1H), 7.33 (d,  $J = 8$  Hz, 1H), 7.31-7.27 (m, 3H), 7.24-7.22 (m, 2H), 7.10 (d,  $J = 2$  Hz, 1H), 7.05 (t,  $J = 15$ , 7 Hz, 1H), 6.98 (t,  $J = 15$ , 7 Hz, 1H), 4.58-4.54 (m, 1H), 4.05-4.02 (m, 1H), 3.57 (s, 3H), 3.20-3.07 (m, 2H), 3.07-2.84 (m, 2H) ppm.  $^{13}\text{C}$  NMR (125 MHz,  $\text{CDCl}_3$ )  $\delta$ : 171.8, 168.1, 136.0, 135.7, 129.3, 128.4, 127.2, 127.0, 122.7, 122.8, 121.9, 118.2, 111.2, 108.8, 64.6, 52.6, 52.2, 37.8, 27.4 ppm. ESI-TOF ( $m/z$ )  $[\text{M}+\text{H}]^+$  obsd. = 392.1710 (calc. = 392.1717).

**General procedure for saponification of 17a-d to give azido acids (5a-d)**. The azido ester protected dipeptide **17** (0.884 mmol, 1 eq) was dissolved in THF/MeOH (1:1, 8 mL). A 1M solution of NaOH (aq, 2.21 mmol, 2.5 eq) was added to the reaction vessel slowly, and the reaction was left stirring at room temperature for 1 h. The vessel was then put on ice and acidified using 5%  $\text{KHSO}_4$  (aq). The organic solvent was removed under vacuum, followed by addition of EtOAc (30 mL) to the aqueous slurry, and extraction with  $\text{H}_2\text{O}$  (2 x 15 mL) and brine (15 mL). The organic layer was dried with  $\text{MgSO}_4$ , filtered, and the solvent removed under vacuum to leave a clear oil. The oil was dissolved in  $\text{CHCl}_3$ , then evaporated under vacuum (x3) to leave analytically pure azido acid dipeptide product **5** as a white solid.

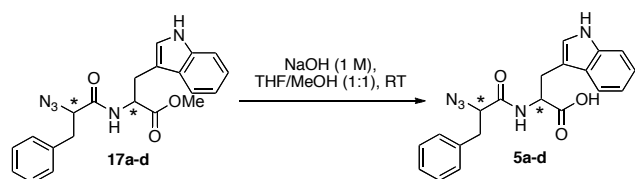

**$\text{N}_3$ -L-Phe-L-Trp-OH (5a)**. White solid (327 mg, 98%).  $^1\text{H}$  NMR (400 MHz,  $\text{DMSO}-d_6$ )  $\delta$ : 10.86 (s, 1H), 8.51 (d,  $J = 8$  Hz, 1H), 7.51 (d,  $J = 8$  Hz, 1H), 7.33-7.28 (m, 3H), 7.26-7.22 (m, 3H), 7.09 (d,  $J = 2$  Hz, 1H), 7.05 (t,  $J = 15$ , 7 Hz, 1H), 6.97 (t,  $J = 15$ , 7 Hz, 1H), 4.54-4.49 (m, 1H), 4.06-4.02 (m, 1H), 3.22-2.82 (m, 4H) ppm.  $^{13}\text{C}$  NMR (125 MHz,  $\text{CDCl}_3$ )  $\delta$ : 175.2, 168.9, 136.0, 135.8, 129.6, 128.6, 127.4, 127.3, 123.0, 122.3, 119.6, 118.6, 111.3, 109.1, 64.9, 52.8, 38.1, 27.2 ppm. ESI-TOF  $[\text{M}+\text{Na}]^+$  obsd. = 400.1378 (calc. = 400.1380).

**$\text{N}_3$ -L-Phe-D-Trp-OH (5b)**. White solid (315 mg, 94%).  $^1\text{H}$  NMR (500 MHz,  $\text{DMSO}-d_6$ )  $\delta$ : 10.83 (s, 1H), 8.52 (d,  $J = 8$  Hz, 1H), 7.52 (d,  $J = 8$  Hz, 1H), 7.31 (d,  $J = 8$  Hz, 1H), 7.25-7.20 (m, 3H), 7.15-7.14 (m, 2H), 7.04 (t,  $J = 15$ , 8 Hz, 1H), 7.00 (d,  $J = 3$  Hz, 1H), 6.97 (t,  $J = 15$ , 7 Hz, 1H), 4.53-4.48 (m, 1H), 4.03-4.00 (m, 1H), 3.15-2.97 (m, 2H), 2.87-2.74 (m, 2H) ppm.  $^{13}\text{C}$  NMR (125 MHz,  $\text{CDCl}_3$ )  $\delta$ : 174.9, 169.5, 136.0, 135.9, 129.2, 128.6, 127.3, 127.1, 123.1, 122.1, 119.6, 118.2, 111.4, 109.0, 65.1, 53.2, 38.5, 27.0 ppm. ESI-TOF  $[\text{M}+\text{Na}]^+$  obsd. = 400.1385 (calc. = 400.1380).

**$\text{N}_3$ -D-Phe-L-Trp-OH (5c)**. White solid (330 mg, quant.).  $^1\text{H}$  NMR (400 MHz,  $\text{DMSO}-d_6$ )  $\delta$ : 10.83 (s, 1H), 8.54 (d,  $J = 8$  Hz, 1H), 7.52 (d,  $J = 8$  Hz, 1H), 7.31 (d,  $J = 8$  Hz, 1H), 7.25-7.14 (m, 5H), 7.05 (t,  $J = 15$ , 8 Hz, 1H), 7.01 (d,  $J = 3$  Hz, 1H), 6.97 (t,  $J = 15$ , 7 Hz, 1H), 4.53-4.48 (m, 1H), 4.03-4.00 (m, 1H), 3.16-2.96 (m, 2H), 2.87-2.73 (m, 2H) ppm.  $^{13}\text{C}$  NMR (125 MHz,  $\text{CDCl}_3$ )  $\delta$ : 174.9, 169.7, 136.1, 135.8, 129.3, 128.6, 127.3, 127.2, 123.2, 122.2,

119.6, 118.2, 111.5, 108.9, 65.1, 53.2, 38.5, 27.1 ppm. ESI-TOF  $[\text{M}+\text{Na}]^+$  obsd. = 400.1380 (calc. = 400.1380).

**$\text{N}_3$ -D-Phe-D-Trp-OH (5d)**. White solid (323 mg, 97%).  $^1\text{H}$  NMR (500 MHz,  $\text{DMSO}-d_6$ )  $\delta$ : 10.82 (s, 1H), 8.50 (d,  $J = 8$  Hz, 1H), 7.51 (d,  $J = 8$  Hz, 1H), 7.31 (d,  $J = 8$  Hz, 1H), 7.30-7.28 (m, 2H), 7.23-7.21 (m, 3H), 7.08 (d,  $J = 3$  Hz, 1H), 7.05 (t,  $J = 15$ , 8 Hz, 1H), 6.95 (t,  $J = 15$ , 7 Hz, 1H), 4.53-4.49 (m, 1H), 4.05-4.02 (m, 1H), 3.21-3.05 (m, 2H), 3.06-2.82 (m, 2H) ppm.  $^{13}\text{C}$  NMR (125 MHz,  $\text{CDCl}_3$ )  $\delta$ : 175.3, 170.0, 136.6, 136.3, 130.1, 129.1, 127.9, 127.8, 123.8, 122.7, 120.2, 119.0, 111.9, 109.4, 65.2, 53.6, 38.5, 27.7 ppm. ESI-TOF  $[\text{M}+\text{Na}]^+$  obsd. = 400.1378 (calc. = 400.1380).

**Standard amino acid to amino alkyne coupling (6a-d)**. Boc protected amino alkyne (1.73 mmol, 1.2 eq) was dissolved in TFA:DCM (1:1) and stirred at room temperature for 30 min. The solvent was removed under vacuum, and the resulting residue was dissolved in  $\text{CHCl}_3$  and evaporated to dryness (x3) to remove any trace TFA. The residue (deprotected amino alkyne) was then dissolved in DCM (10 mL) and DIEA was added (4.32 mmol, 3.0 eq). The reaction mixture was cooled to 0  $^\circ\text{C}$  (15 min) followed by addition of EDC (1.58 mmol, 1.1 eq), HOBT (1.58 mmol, 1.1eq), and the amino acid (1.44 mmol, 1 eq) in that order. The reaction was allowed to run at 0  $^\circ\text{C}$  for 30 min at which time the reaction warmed to RT. After 2.5 h at RT, the reaction mixture was transferred to a separation funnel using DCM (40 mL), and the organic layer was extracted once each with 5%  $\text{KHSO}_4$  (aq, 30 mL), 5%  $\text{NaHCO}_3$  (aq, 30 mL),  $\text{H}_2\text{O}$  (30 mL) and brine (30 mL). The organic layer was then dried with  $\text{MgSO}_4$ , filtered, and concentrated under vacuum. The resulting crude product was purified by flash chromatography using EtOAc:hexanes (1:1) as eluent. Eluent was removed under vacuum to leave a yellowish oil which was subsequently dissolved in  $\text{CHCl}_3$  and evaporated under vacuum (x3) to yield a white flaky solid.

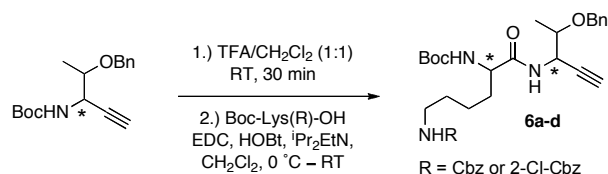

**Boc-L-Lys(Z)-L-Thr(Bn)-CCH (6a)**. yellowish white solid (683 mg, 86% yield).  $^1\text{H}$  NMR (500 MHz,  $\text{DMSO}-d_6$ )  $\delta$ : 8.12 (d,  $J = 10$  Hz, 1H), 7.37-7.27 (m, 8H), 7.27-7.26 (m, 1H), 7.26-7.25 (m, 1H), 6.84 (d,  $J = 10$  Hz, 1H), 4.99 (s, 2H), 4.73-4.71 (m, 1H), 4.54 (s, 2H), 3.91-3.88 (m, 1H), 3.61-3.56 (m, 1H), 3.21 (d,  $J = 2$  Hz, 1H), 2.95-2.93 (m, 2H), 1.51-1.45 (m, 2H), 1.35 (s, 9H), 1.29 (bs, 2H), 1.23-1.21 (m, 2H), 1.15 (d,  $J = 5$  Hz, 3H) ppm.  $^{13}\text{C}$  NMR (125 MHz,  $\text{CDCl}_3$ )  $\delta$ : 172.1, 157.0, 156.1, 138.6, 137.0, 128.9, 128.8, 128.6, 128.5, 128.2, 128.1, 81.6, 80.4, 75.8, 72.4, 71.9, 67.0, 54.6, 45.7, 40.9, 32.2, 29.9, 28.7, 22.9, 16.7 ppm. ESI-TOF ( $m/z$ )  $[\text{M}+\text{H}]^+$  obsd. = 552.3066 (calc. = 552.3088).

**Boc-L-Lys(Z)-D-Thr(Bn)-CCH (6b)**. white solid (702 mg, 88% yield).  $^1\text{H}$  NMR (400 MHz,  $\text{DMSO}-d_6$ )  $\delta$ : 8.18 (d,  $J = 6$  Hz, 1H), 7.36-7.27 (m, 8H), 7.26-7.24 (m, 1H), 7.22-7.19 (m, 1H), 6.84 (d,  $J = 8$  Hz, 1H), 4.98 (s, 2H), 4.73-4.70 (m, 1H), 4.52 (s, 2H), 3.91-3.88 (m, 1H), 3.57-3.52 (m, 1H), 3.24 (d,  $J = 2$  Hz, 1H), 2.93-2.89 (m, 2H), 1.50-1.42 (m, 2H), 1.35 (s, 9H), 1.31-1.19 (m, 4H), 1.17 (d,  $J = 5$  Hz, 3H) ppm.  $^{13}\text{C}$  NMR (125 MHz,  $\text{CDCl}_3$ )  $\delta$ : 171.6, 156.5, 155.5, 138.0, 136.5, 128.4, 128.2, 128.0, 127.8, 127.6, 127.6, 81.3, 81.3, 75.4, 71.7, 71.4, 66.5, 54.4, 45.1, 40.2, 31.6,

29.4, 28.2, 22.4, 16.2 ppm. ESI-TOF ( $m/z$ )  $[M+H]^+$  obsd. = 552.3068 (calc. = 552.3088).

**Boc-D-Lys(2-Cl-Z)-L-Thr(Bn)-CCH (6c).** white solid (743 mg, 88% yield).  $^1H$  NMR (400 MHz, DMSO- $d_6$ )  $\delta$ : 8.18 (d,  $J = 9$  Hz, 1H), 7.47-7.43 (m, 2H), 7.36-7.31 (m, 6H), 7.27-7.25 (m, 1H), 6.85 (d,  $J = 8$  Hz, 1H), 5.06 (s, 2H), 4.74-4.70 (m, 1H), 4.53 (s, 2H), 3.91-3.88 (m, 1H), 3.57-3.53 (m, 1H), 3.25 (d,  $J = 2$  Hz, 1H), 2.94-2.91 (m, 2H), 1.50-1.42 (m, 2H), 1.35 (s, 9H), 1.33-1.20 (m, 4H), 1.13 (d,  $J = 6$  Hz, 3H) ppm.  $^{13}C$  NMR (125 MHz, CDCl $_3$ )  $\delta$ : 171.6, 156.3, 155.6, 137.9, 134.2, 133.3, 129.5, 129.3, 129.1, 128.2, 127.6, 127.5, 126.7, 81.1, 79.9, 75.3, 71.7, 71.3, 63.7, 54.3, 45.0, 40.2, 31.6, 29.2, 28.1, 22.3, 16.1 ppm. ESI-TOF ( $m/z$ )  $[M+Na]^+$  obsd. = 608.2497 (calc. = 608.2498).

**Boc-D-Lys(2-Cl-Z)-D-Thr(Bn)-CCH (6d).** white solid (698 mg, 83% yield).  $^1H$  NMR (500 MHz, DMSO- $d_6$ )  $\delta$ : 8.09 (d,  $J = 9$  Hz, 1H) 7.45-7.41 (m, 2H), 7.34-7.29 (m, 6H), 7.25-7.23 (m, 1H), 6.82 (d,  $J = 8$  Hz, 1H), 5.04 (s, 2H), 4.71-4.68 (m, 1H) 4.52 (s, 2H), 3.92-3.87 (m, 1H), 3.60-3.56 (m, 1H), 3.19 (d,  $J = 3$  Hz, 1H), 2.93-2.91 (m, 2H), 1.48-1.43 (m, 2H), 1.32 (s, 9H), 1.28 (bs, 2H), 1.21-1.20 (m, 2H), 1.15 (d,  $J = 6$  Hz, 3H) ppm.  $^{13}C$  NMR (125 MHz, CDCl $_3$ )  $\delta$ : 171.5, 156.2, 155.6, 137.9, 134.2, 133.3, 129.6, 129.3, 129.1, 128.2, 127.6, 127.5, 126.7, 79.9, 75.2, 71.8, 71.3, 70.8, 63.6, 54.0, 45.0, 40.4, 31.6, 29.2, 28.1, 22.3, 16.0 ppm. ESI-TOF ( $m/z$ )  $[M+Na]^+$  obsd. = 586.2674 (calc. = 586.2678).

**Parallel synthesis of cyclic pseudo-tetrapeptides (7a–7h and ent-7a–ent-7h):** Boc protected amino alkyne (**6**) (0.027 mmol, 1 eq) was dissolved in TFA/DCM (1:1) and stirred at RT for 30 minutes. The solvent was removed under vacuum, and the residue was subsequently dissolved in CHCl $_3$  and evaporated to dryness (x3) to remove any excess TFA. The crude residue (deprotected amino alkyne dipeptide) was then dissolved in DMF (1 mL), followed by addition of the azido acid dipeptide (**5**) (0.030 mmol, 1.1 eq), and, lastly, DIEA (0.3 mmol, 3 eq) was added in one portion. The solution was cooled to 0 °C (10 min). At 0 °C HATU (0.030 mmol, 1.1 eq) was added in one portion. The reaction was held at 0 °C for 30 minutes, then left at RT for 3 h. After 3 h the linear tetramer was quantified by integrating an HPLC trace using Ac-Trp-OH as a standard ( $\lambda = 280$  nm,  $\epsilon_{Trp} = 5690$  M $^{-1}$ •cm $^{-1}$ ). Additional DMF was added to give a final concentration of 1 mM. 2,6-Lutidine (2 eq), DIEA (10 eq), and TBTA (2 eq) were added to the solution. The reaction was degassed by bubbling argon for 30 minutes. CuI (2 eq) was added in one portion to the reaction vessel and the reaction was left at ambient temperature under argon overnight. The DMF was then removed under vacuum with heating ( $\leq 40$  °C). The resulting brown residue was transferred to an HF vessel as a slurry using DCM. Anisole (500  $\mu$ L) was added as a scavenger, and the vessel was purged with N $_2$ . The residue was treated with HF (~10 mL) at -76 °C and then warmed to 0 °C and left for 1 h. The HF was removed by bubbling N $_2$ , and the resulting solid was transferred with TFA (2 mL) and precipitated with ether (40 mL) leaving a suspension of a white solid. The white solid was isolated via centrifugation and removal of the supernatant. The resulting solid was purified via RP-HPLC (25–55% solvent B) and lyophilized leaving the triazole substituted cyclic tetrapeptide **7** as a white fluffy solid. Yields were determined via UV ( $\lambda = 280$  nm,  $\epsilon_{Trp} = 5690$  M $^{-1}$ •cm $^{-1}$ ) and are based on dipeptide starting material (4 steps). Tetramer formation was confirmed via isotopic distribution of HRMS.

**cyclo[1,4-(1,2,3-triazole)-L-Phe-L-Trp-L-Lys-L-Thr] (7a).** White solid (36% cyclization yield, 24% overall yield).  $^1H$  NMR (600 MHz, DMSO- $d_6$ )  $\delta$ : 10.88 (s, 1H), 8.28 (s, 1H), 8.20 (d,  $J = 10$  Hz,

1H), 7.83 (d,  $J = 9$  Hz, 1H), 7.78 (d,  $J = 9$  Hz, 1H), 7.63 (bs, 3H), 7.53 (d,  $J = 8$  Hz, 1H), 7.36 (d,  $J = 8$  Hz, 1H), 7.16-7.06 (m, 7H), 6.98 (t,  $J = 16$ , 8 Hz, 1H), 5.21-5.17 (m, 2H), 4.56-4.53 (m, 1H), 4.45-4.42 (m, 1H), 4.26-4.23 (m, 1H), 3.98-3.94 (m, 1H), 3.58-3.43 (m, 2H), 3.11-3.08 (m, 2H), 2.73-2.71 (m, 2H), 1.80-1.76 (m, 1H), 1.62-1.60 (m, 1H), 1.51-1.48 (m, 2H), 1.21-1.16 (m, 2H), 1.14 (d,  $J = 6$  Hz, 3H) ppm. ESI-TOF  $[M+H]^+$  obsd. = 587.3079 (calc. = 587.3089).

**cyclo[1,4-(1,2,3-triazole)-D-Phe-L-Trp-L-Lys-L-Thr] (7b).** White solid (59% cyclization yield, 20% overall yield).  $^1H$  NMR (600 MHz, DMSO- $d_6$ )  $\delta$ : 10.86 (s, 1H), 8.42 (d,  $J = 8$  Hz, 1H), 8.16 (s, 1H), 7.92 (d,  $J = 9$  Hz, 1H), 7.68 (bs, 3H), 7.59 (d,  $J = 10$  MHz, 1H), 7.46 (d,  $J = 8$  Hz, 1H), 7.32 (d,  $J = 8$  Hz, 1H), 7.25-7.19 (m, 5H), 7.07-7.04 (m, 2H), 6.96 (t,  $J = 15$ , 8 Hz, 1H), 5.45 (t,  $J = 15$ , 7 Hz, 1H), 5.15 (d,  $J = 5$  Hz, 1H), 4.67-4.65 (m, 1H), 4.43-4.41 (m, 1H), 4.08-4.05 (m, 1H), 3.77-3.74 (m, 1H), 3.55 (d,  $J = 5$  Hz, 2H), 3.06-2.93 (m, 2H), 2.66-2.63 (m, 2H), 1.77-1.72 (m, 1H), 1.59-1.54 (m, 1H), 1.46-1.42 (m, 2H), 1.14 (d,  $J = 6$  Hz, 3H), 1.10-1.05 (m, 2H) ppm. ESI-TOF  $[M+H]^+$  obsd. = 587.3082 (calc. = 587.3089).

**cyclo[1,4-(1,2,3-triazole)-L-Phe-D-Trp-L-Lys-L-Thr] (7c).** White solid (90% cyclization yield, 48% overall yield).  $^1H$  NMR (500 MHz, DMSO- $d_6$ )  $\delta$ : 10.78 (s, 1H), 8.63 (d,  $J = 10$  Hz, 1H), 7.94 (d,  $J = 10$  Hz, 1H), 7.81 (s, 1H), 7.65 (bs, 3H), 7.52 (d,  $J = 8$  Hz, 1H), 7.33-7.13 (m, 8H), 7.07-7.02 (m, 2H), 6.95 (t,  $J = 15$ , 7 Hz, 1H), 5.44-5.41 (m, 1H), 4.66-4.57 (m, 2H), 4.07-4.03 (m, 2H), 3.53-3.48 (m, 1H), 3.28-3.00 (m, 2H), 2.79-2.75 (m, 2H), 2.66-2.63 (m, 2H), 1.59-1.54 (m, 2H) 1.42-1.39 (m, 2H), 1.10 (d,  $J = 6$  Hz, 3H), 1.05-1.03 (m, 2H) ppm. ESI-TOF  $[M+H]^+$  obsd. = 587.3083 (calc. = 587.3089).

**cyclo[1,4-(1,2,3-triazole)-L-Phe-L-Trp-D-Lys-L-Thr] (7d).** White solid (80% cyclization yield, 21% overall yield).  $^1H$  NMR (600 MHz, DMSO- $d_6$ )  $\delta$ : 10.75 (s, 1H), 8.26 (d,  $J = 8$  Hz, 1H), 8.20 (d,  $J = 9$  Hz, 1H), 7.89 (s, 1H), 7.60 (bs, 3H), 7.50 (d,  $J = 8$  Hz, 1H), 7.33-7.18 (m, 7H), 7.05-7.03 (m, 2H), 6.95 (t,  $J = 15$ , 7 Hz, 1H), 5.24 (t,  $J = 17$ , 8 Hz, 1H), 4.71-4.69 (m, 1H), 4.52-4.48 (m, 1H), 4.17-4.13 (m, 1H), 4.04-4.00 (m, 1H), 3.75-3.52 (m, 2H), 3.17-3.02 (m, 2H), 2.68-2.65 (m, 2H), 1.55-1.50 (m, 1H), 1.42-1.36 (m, 3H), 1.18 (d,  $J = 6$  Hz, 3H), 1.03-0.98 (m, 2H) ppm. ESI-TOF  $[M+H]^+$  obsd. = 587.3090 (calc. = 587.3089).

**cyclo[1,4-(1,2,3-triazole)-D-Phe-D-Trp-D-Lys-L-Thr] (7e).** White solid (31% cyclization yield, 20% overall yield).  $^1H$  NMR (600 MHz, DMSO- $d_6$ )  $\delta$ : 10.95 (s, 1H), 8.26 (d,  $J = 9$  Hz, 1H), 8.09 (d,  $J = 10$  Hz, 1H), 7.73 (bs, 3H), 7.65 (s, 1H), 7.54 (d,  $J = 8$  Hz, 1H), 7.40-7.31 (m, 3H), 7.24 (d,  $J = 8$  Hz, 1H), 7.13-6.98 (m, 5H), 6.77 (d,  $J = 8$  Hz, 1H), 5.02-5.00 (m, 1H), 4.82-4.79 (m, 1H), 4.58-4.50 (m, 1H), 4.23-4.19 (m, 1H), 4.30 (bs, 1H) 3.97-3.92 (m, 1H), 3.88-3.85 (m, 1H), 3.06-3.01 (m, 3H), 2.76-2.72 (m, 2H), 1.62-1.60 (m, 1H), 1.54-1.50 (m, 2H), 1.47-1.39 (m, 1H), 1.21-1.16 (m, 2H), 1.12 (d,  $J = 7$  Hz, 3H) ppm. ESI-TOF  $[M+H]^+$  obsd. = 587.3081 (calc. = 587.3089).

**cyclo[1,4-(1,2,3-triazole)-L-Phe-D-Trp-D-Lys-L-Thr] (7f).** White solid (64% cyclization yield, 30% overall yield).  $^1H$  NMR (600 MHz, DMSO- $d_6$ )  $\delta$ : 10.81 (s, 1H), 8.13-8.09 (m, 2H), 7.68 (bs, 3H), 7.49 (s, 1H), 7.45 (d,  $J = 8$  Hz, 1H), 7.32 (d,  $J = 9$  Hz, 1H), 7.19-7.15 (m, 3H), 7.08-7.02 (m, 5H), 6.96 (t,  $J = 14$ , 7 Hz, 1H), 5.35 (t,  $J = 14$ , 7 Hz, 1H), 4.71-4.69 (m, 1H), 4.63-4.61 (m, 1H), 4.14-4.11 (m, 1H), 3.94-3.90 (m, 1H), 3.30-3.21 (m, 2H), 3.05-2.90 (m, 2H), 2.76-2.68 (m, 2H), 1.57-1.54 (m, 1H), 1.49-1.44 (m, 2H), 1.37-1.33 (m, 1H), 1.10-1.07 (m, 5H) ppm. ESI-TOF  $[M+H]^+$  obsd. = 587.3083 (calc. = 587.3089).

**cyclo[1,4-(1,2,3-triazole)-L-Phe-L-Trp-D-Lys-D-Thr] (7g).** White solid (36% cyclization yield, 22% overall yield). <sup>1</sup>H NMR (600 MHz, DMSO-*d*<sub>6</sub>) δ: 10.74 (s, 1H), 7.97 (s, 1H), 7.93 (d, *J* = 8 Hz, 1H), 7.80 (d, *J* = 9 Hz, 1H), 7.63 (bs, 3H), 7.49 (d, *J* = 8 Hz, 1H), 7.32-7.27 (m, 5H), 7.24-7.20 (m, 2H), 7.04 (t, *J* = 15, 7 Hz, 1H), 6.96-6.93 (m, 2H), 5.26-5.23 (m, 1H), 5.10 (bs, 1H), 4.68-4.66 (m, 1H), 4.39-4.35 (m, 1H), 4.12-4.07 (m, 2H), 3.75-3.67 (m, 2H), 3.13-2.79 (m, 2H), 2.70-2.66 (m, 2H), 1.61-1.55 (m, 1H), 1.47-1.39 (m, 3H), 1.20-1.12 (m, 1H), 1.10 (d, *J* = 6 Hz, 3H) ppm. ESI-TOF [M+H]<sup>+</sup> obsd. = 587.3074 (calc. = 587.3089).

**cyclo[1,4-(1,2,3-triazole)-L-Phe-D-Trp-L-Lys-D-Thr] (7h).** White solid (86% cyclization yield, 59% overall yield). <sup>1</sup>H NMR (600 MHz, DMSO-*d*<sub>6</sub>) δ: 10.81 (s, 1H), 8.68 (d, *J* = 12 Hz, 1H), 8.45 (d, *J* = 10 Hz, 1H), 7.82 (s, 1H), 7.62 (bs, 3H), 7.46 (d, *J* = 12 Hz, 1H), 7.30-7.20 (m, 7H), 7.09 (d, *J* = 2 Hz, 1H), 7.04 (t, *J* = 17, 9 Hz, 1H), 6.94 (t, *J* = 17, 9 Hz, 1H), 5.45 (t, *J* = 18, 9 Hz, 1H), 5.12-5.11 (m, 1H), 4.74-4.71 (m, 1H), 4.60-4.55 (m, 1H), 4.12-4.07 (m, 1H), 3.90-3.88 (m, 1H), 3.62-3.55 (m, 2H), 3.07-2.81 (m, 2H), 2.63-2.59 (m, 2H), 1.48-1.45 (m, 1H), 1.38-1.29 (m, 3H), 1.15 (d, *J* = 8 Hz, 3H), 0.89-0.85 (m, 2H) ppm. ESI-TOF [M+H]<sup>+</sup> obsd. = 587.3086 (calc. = 587.3089).

**cyclo[1,4-(1,2,3-triazole)-D-Phe-D-Trp-D-Lys-D-Thr] (ent-7a).** White solid. <sup>1</sup>H NMR (600 MHz, DMSO-*d*<sub>6</sub>) δ: 10.89 (s, 1H), 8.38 (s, 1H), 8.18 (d, *J* = 8 Hz, 1H), 7.92 (d, *J* = 8 Hz, 1H), 7.70-7.64 (m, 4H), 7.53 (d, *J* = 8 Hz, 1H), 7.36 (d, *J* = 7 Hz, 1H), 7.15-7.06 (m, 7H), 6.98 (t, *J* = 16, 8 Hz, 1H), 5.20-5.15 (m, 2H), 4.61-4.59 (m, 1H), 4.46-4.42 (m, 1H), 4.20-4.15 (m, 1H), 4.05-4.00 (m, 1H), 3.56-3.43 (m, 2H), 3.14-3.06 (m, 2H), 2.73-2.71 (m, 2H), 1.80-1.76 (m, 1H), 1.65-1.62 (m, 1H), 1.53-1.49 (m, 2H), 1.23-1.19 (m, 2H), 1.13 (d, *J* = 6 Hz, 3H) ppm; <sup>13</sup>C NMR (151 MHz, DMSO-*d*<sub>6</sub>) δ: 172.5, 171.6, 167.5, 151.1, 137.5, 136.8, 130.2, 129.7, 128.3, 128.2, 124.9, 123.3, 122.3, 119.7, 119.4, 112.8, 110.8, 69.0, 67.4, 57.9, 56.3, 56.0, 39.9, 35.8, 30.8, 28.2, 27.8, 23.6, 22.2 ppm. ESI-TOF [M+H]<sup>+</sup> obsd. = 587.3090 (calc. = 587.3089).

**cyclo[1,4-(1,2,3-triazole)-L-Phe-D-Trp-D-Lys-D-Thr] (ent-7b).** White solid. <sup>1</sup>H NMR (600 MHz, DMSO-*d*<sub>6</sub>) δ: 10.85 (s, 1H), 8.39 (d, *J* = 8 Hz, 1H), 8.09 (s, 1H), 7.87 (d, *J* = 8 Hz, 1H), 7.64-7.60 (m, 4H), 7.46 (d, *J* = 8 Hz, 1H), 7.32 (d, *J* = 8 Hz, 1H), 7.25-7.16 (m, 5H), 7.06-7.04 (m, 2H), 6.96 (t, *J* = 15, 8 Hz, 1H), 5.45 (t, *J* = 15, 7 Hz, 1H), 5.15 (bs, 1H), 4.67-4.65 (m, 1H), 4.44-4.40 (m, 1H), 4.08-4.07 (m, 1H), 3.75-3.73 (m, 1H), 3.56-3.53 (m, 2H), 3.06-2.88 (m, 2H), 2.66-2.63 (m, 2H), 1.77-1.73 (m, 1H), 1.58-1.54 (m, 1H), 1.45-1.42 (m, 2H), 1.14 (d, *J* = 6 Hz, 3H), 1.09-1.07 (m, 2H) ppm; <sup>13</sup>C NMR (151 MHz, DMSO-*d*<sub>6</sub>) δ: 171.2, 170.6, 166.5, 149.1, 137.5, 136.2, 129.1, 128.4, 127.0, 126.6, 123.1, 122.2, 121.0, 118.3, 118.1, 111.4, 109.3, 66.0, 64.2, 56.4, 55.7, 53.7, 38.6, 32.4, 29.2, 27.0, 26.5, 22.3, 20.7 ppm. ESI-TOF [M+H]<sup>+</sup> obsd. = 587.3083 (calc. = 587.3089).

**cyclo[1,4-(1,2,3-triazole)-D-Phe-L-Trp-D-Lys-D-Thr] (ent-7c).** White solid. <sup>1</sup>H NMR (500 MHz, DMSO-*d*<sub>6</sub>) δ: 10.80 (s, 1H), 8.64 (d, *J* = 10 Hz, 1H), 7.96 (d, *J* = 9 Hz, 1H), 7.81 (s, 1H), 7.69 (bs, 3H), 7.52 (d, *J* = 8 Hz, 1H), 7.32 (d, *J* = 8 Hz, 1H) 7.30-7.15 (m, 6H), 7.07-7.02 (m, 2H), 6.97 (t, *J* = 14, 7 Hz, 1H), 5.44-5.41 (m, 1H), 4.66-4.60 (m, 2H), 4.06-4.05 (m, 2H), 3.57-3.48 (m, 1H), 3.25-3.01 (m, 2H), 2.78-2.75 (m, 2H), 2.66-2.63 (m, 2H), 1.59-1.54 (m, 2H) 1.42-1.39 (m, 2H), 1.10 (d, *J* = 6 Hz, 3H), 1.05-1.03 (m, 2H) ppm; <sup>13</sup>C NMR (151 MHz, DMSO-*d*<sub>6</sub>) δ: 171.2, 168.9, 167.0, 148.9, 136.6, 136.0, 128.9, 128.0, 127.0, 126.5, 122.9, 122.7, 120.8, 118.1, 118.1, 111.2, 109.6, 66.1, 63.6, 54.9, 54.2, 53.2, 38.4, 35.6, 29.0, 27.1, 26.1, 21.9, 20.8 ppm. ESI-TOF [M+H]<sup>+</sup> obsd. = 587.3084 (calc. = 587.3089).

**cyclo[1,4-(1,2,3-triazole)-D-Phe-D-Trp-L-Lys-D-Thr] (ent-7d).** White solid. <sup>1</sup>H NMR (600 MHz, DMSO-*d*<sub>6</sub>) δ: 10.78 (s, 1H), 8.31 (d, *J* = 8 Hz, 1H), 8.29 (d, *J* = 9 Hz, 1H), 7.89 (s, 1H), 7.61 (bs, 3H), 7.50 (d, *J* = 8 Hz, 1H), 7.36-7.18 (m, 7H), 7.05-7.03 (m, 2H), 6.94 (t, *J* = 14, 7 Hz, 1H), 5.24 (t, *J* = 17, 8 Hz, 1H), 5.15 (d, *J* = 5 Hz, 1H) 4.70-4.68 (m, 1H), 4.51-4.48 (m, 1H), 4.15-4.14 (m, 1H), 4.04-4.00 (m, 1H), 3.76-3.53 (m, 2H), 3.16-3.03 (m, 2H), 2.68-2.65 (m, 2H), 1.55-1.49 (m, 1H), 1.42-1.31 (m, 3H), 1.18 (d, *J* = 6 Hz, 3H), 1.02-0.97 (m, 2H) ppm; <sup>13</sup>C NMR (151 MHz, DMSO-*d*<sub>6</sub>) δ: 170.4, 170.2, 169.8, 149.2, 136.0, 135.9, 129.0, 128.3, 127.1, 126.7, 123.1, 122.2, 120.7, 118.2, 118.1, 111.1, 109.6, 68.0, 65.9, 54.0, 52.8, 52.2, 38.5, 34.0, 27.8, 26.5, 26.2, 21.7, 20.7 ppm. ESI-TOF [M+H]<sup>+</sup> obsd. = 587.3083 (calc. = 587.3089).

**cyclo[1,4-(1,2,3-triazole)-L-Phe-L-Trp-L-Lys-D-Thr] (ent-7e).** White solid. <sup>1</sup>H NMR (600 MHz, DMSO-*d*<sub>6</sub>) δ: 10.92 (s, 1H), 8.24 (d, *J* = 9 Hz, 1H), 8.07 (bs, 1H), 7.73 (bs, 3H), 7.65 (s, 1H), 7.55 (d, *J* = 8 Hz, 1H), 7.39 (d, *J* = 8 Hz, 1H) 7.22 (bs, 1H), 7.10-6.98 (m, 6H), 6.78 (d, *J* = 7 Hz, 1H), 5.02-5.00 (m, 1H), 4.82-4.79 (m, 2H), 4.58-4.54 (m, 1H), 4.23-4.21 (m, 1H), 3.97-3.92 (m, 1H), 3.88-3.85 (m, 1H), 3.06-3.01 (m, 3H), 2.76-2.72 (m, 2H), 1.62-1.60 (m, 1H), 1.54-1.50 (m, 2H), 1.47-1.39 (m, 1H), 1.21-1.16 (m, 2H), 1.12 (d, *J* = 7 Hz, 3H) ppm; <sup>13</sup>C NMR (151 MHz, DMSO-*d*<sub>6</sub>) δ: 171.4, 170.5, 166.8, 149.9, 136.2, 135.2, 129.0, 128.3, 127.3, 126.7, 123.7, 122.7, 121.0, 118.3, 118.1, 111.5, 109.7, 67.7, 66.3, 56.9, 54.6, 52.8, 38.7, 34.6, 30.5, 27.0, 26.8, 22.3, 20.8 ppm. ESI-TOF [M+H]<sup>+</sup> obsd. = 587.3089 (calc. = 587.3089).

**cyclo[1,4-(1,2,3-triazole)-D-Phe-L-Trp-L-Lys-D-Thr] (ent-7f).** White solid. <sup>1</sup>H NMR (600 MHz, DMSO-*d*<sub>6</sub>) δ: 10.84 (s, 1H), 8.17-8.10 (m, 2H), 7.63 (bs, 3H), 7.50 (s, 1H), 7.45 (d, *J* = 9 Hz, 1H), 7.33 (d, *J* = 9 Hz, 1H), 7.19-7.16 (m, 3H), 7.08-7.02 (m, 4H), 6.96 (t, *J* = 15, 7 Hz, 1H), 5.35 (t, *J* = 14, 7 Hz, 1H), 4.70-4.67 (m, 1H), 4.63-4.59 (m, 1H), 4.14-4.10 (m, 1H), 3.93-3.91 (m, 1H), 3.40-3.21 (m, 2H), 3.05-2.90 (m, 2H), 2.71-2.68 (m, 2H), 1.56-1.53 (m, 1H), 1.48-1.44 (m, 2H), 1.37-1.33 (m, 1H), 1.10-1.07 (m, 5H) ppm; <sup>13</sup>C NMR (151 MHz, DMSO-*d*<sub>6</sub>) δ: 171.3, 170.2, 166.3, 149.5, 136.4, 136.0, 129.0, 128.2, 127.1, 126.5, 123.3, 122.0, 120.9, 118.3, 118.1, 111.4, 109.6, 66.5, 63.4, 56.7, 54.9, 53.0, 38.7, 36.3, 30.2, 26.9, 26.8, 22.3, 20.8 ppm. ESI-TOF [M+H]<sup>+</sup> obsd. = 587.3082 (calc. = 587.3089).

**cyclo[1,4-(1,2,3-triazole)-D-Phe-D-L-Trp-L-Lys-L-Thr] (ent-7g).** White solid. <sup>1</sup>H NMR (600 MHz, DMSO-*d*<sub>6</sub>) δ: 10.73 (s, 1H), 7.97 (s, 1H), 7.93 (d, *J* = 8 Hz, 1H), 7.79 (d, *J* = 9 Hz, 1H), 7.63 (bs, 3H), 7.49 (d, *J* = 8 Hz, 1H), 7.32-7.17 (m, 7H), 7.04 (t, *J* = 15, 7 Hz, 1H), 6.96-6.93 (m, 2H), 5.26-5.23 (m, 1H), 5.10 (bs, 1H), 4.68-4.66 (m, 1H), 4.39-4.35 (m, 1H), 4.12-4.07 (m, 2H), 3.76-3.67 (m, 2H), 3.13-2.80 (m, 2H), 2.70-2.66 (m, 2H), 1.61-1.55 (m, 1H), 1.46-1.43 (m, 3H), 1.20-1.12 (m, 1H), 1.10 (d, *J* = 6 Hz, 3H) ppm; <sup>13</sup>C NMR (151 MHz, DMSO-*d*<sub>6</sub>) δ: 171.3, 168.8, 167.7, 149.4, 136.3, 136.1, 129.3, 128.3, 127.2, 126.3, 124.0, 123.3, 120.8, 118.2, 118.2, 111.3, 110.0, 67.8, 66.1, 54.9, 53.9, 53.6, 38.6, 32.9, 39.4, 26.3, 26.3, 22.1, 20.6 ppm. ESI-TOF [M+H]<sup>+</sup> obsd. = 587.3085 (calc. = 587.3089).

**cyclo[1,4-(1,2,3-triazole)-D-Phe-L-Trp-D-Lys-L-Thr] (ent-7h).** White solid. <sup>1</sup>H NMR (600 MHz, DMSO-*d*<sub>6</sub>) δ: 10.81 (s, 1H), 8.68 (d, *J* = 10 Hz, 1H), 8.45 (d, *J* = 8 Hz, 1H), 7.82 (s, 1H), 7.61 (bs, 3H), 7.46 (d, *J* = 8 Hz, 1H), 7.30-7.20 (m, 7H), 7.09 (d, *J* = 2 Hz, 1H), 7.04 (t, *J* = 14, 7 Hz, 1H), 6.94 (t, *J* = 15, 8 Hz, 1H), 5.45 (t, *J* = 14, 8 Hz, 1H), 5.12 (bs, 1H), 4.73-4.71 (m, 1H), 4.59-4.55 (m, 1H), 4.11-4.08 (m, 1H), 3.90 (bs, 1H), 3.62-3.55 (m, 2H), 3.06-2.81 (m, 2H), 2.63-2.59 (m, 2H), 1.49-1.45 (m, 1H), 1.38-1.29 (m, 3H), 1.15 (d, *J* = 6 Hz, 3H), 0.88-0.84 (m, 2H) ppm; <sup>13</sup>C NMR



(151 MHz, DMSO- $d_6$ )  $\delta$ : 170.3, 170.1, 166.5, 148.9, 137.2, 135.3, 129.1, 128.4, 127.1, 126.5, 124.1, 122.9, 120.9, 118.3, 118.2, 111.1, 109.4, 66.3, 64.4, 53.7, 52.7, 52.2, 38.5, 31.8, 27.7, 27.3, 26.6, 21.6, 20.7 ppm. ESI-TOF  $[M+H]^+$  obsd. = 587.3078 (calc. = 587.3089).

#### 4. Determination of somatostatin receptor affinity profiles.

The compounds were tested for their ability to bind to the five human sst receptor subtypes in complete displacement experiments using the universal SRIF radioligand [ $^{125}$ I]-[Leu<sup>8</sup>, D-Trp<sup>22</sup>, Tyr<sup>25</sup>]-SRIF-28. CHO-K1 and CCL39 cells stably expressing the human sst<sub>1</sub>-sst<sub>5</sub> receptors were grown as described previously.<sup>57</sup> Cell membrane pellets were prepared and receptor autoradiography was done as described in detail previously.<sup>57</sup> SRIF-28 was run in parallel as control. IC<sub>50</sub> values were calculated after quantification of the data using a computer assisted image processing system.<sup>57</sup> The data are shown in Table 1 of the manuscript.

#### 5. Structural determinations and analysis.

##### Crystal Structure of 4

Crystals were obtained by vapor phase diffusion of hexanes into a solution of **4** in chloroform and contained residual TFA from preparative HPLC purification. Diffraction data were collected at 296 K on a Bruker SMART APEX diffractometer equipped with a graphite monochromator using Mo $K_{\alpha}$  radiation ( $\lambda = 0.71073$  Å). Crystal data for 4·CF<sub>3</sub>CO<sub>2</sub>H: colorless crystal 0.16 × 0.22 × 0.28 mm<sup>3</sup>, orthorhombic, C222<sub>1</sub>,  $a = 15.269(3)$ ,  $b = 29.564(6)$ ,  $c = 18.535(4)$  Å,  $a = b = c = 90^\circ$ ,  $V = 8367(3)$  Å<sup>3</sup>,  $r_{\text{calcd}} = 1.275$  gm cm<sup>-3</sup>,  $m = 0.099$  mm<sup>-1</sup>,  $2.76^\circ < 2\theta < 50^\circ$ , 31327 (7380) observed (independent) reflections. Full-matrix least squares refinement against  $F^2$  using SHELXTL-PC gave a final structure with  $R_1 = 0.0860$  (0.2170),  $wR_2 = 0.1505$  (0.2620) for 4140 reflections with  $I > 2s$  (all reflections), GOF ( $F^2$ ) = 1.004. Non-hydrogen atoms were refined anisotropically and hydrogen atoms were fixed at calculated positions relative to C, N, and O atoms. CCDC 698625 contains the supplementary crystallographic data for this paper. These data can be obtained free of charge via [www.ccdc.cam.ac.uk/conts/retrieving.html](http://www.ccdc.cam.ac.uk/conts/retrieving.html) (or from the Cambridge Crystallographic Data Centre, 12, Union Road, Cambridge CB21EZ, UK; fax: (+44)1223-336-033; or deposit@ccdc.cam.ac.uk).

##### Structural Determinations by Multidimensional NMR

NMR structural determinations were carried out for compounds **1–3** and **7a–7h**; the structures of the enantiomers (*ent-7a–ent-7h*) were modelled with Insight II (“reflect” command) using a representative structure from each series of accepted structures. All experiments were carried out in ~7–9 mM solution of peptide in DMSO- $d_6$  on a Bruker DRX-600 MHz instrument. Two-dimensional experiments were obtained using 2048 data points in the direct dimension and 512 data points in the indirect dimension. All 2-D experiments were taken under a regulated temperature of 22 °C with the exceptions of **1** (27 °C), **2** (40 °C), and **7f** (27 °C) for improved peak separations. TOCSY or COSY spectra were obtained for initial peak assignment. ROESY spectra were taken using a mixing time of 200 ms. Integration was performed using the program NEASY followed by peak sorting and normalization via Microsoft Excel. Using the equation  $I = cr^6$ ,

where  $I$  is peak intensity,  $r$  is distance between protons, and  $c$  is a constant, the rOe measurements were converted to a scale of strong ( $\leq 2.7$  Å), medium ( $\leq 3.5$  Å) and weak ( $\leq 4.5$  Å) rOe using the rOe of two geminal CH<sub>2</sub> protons as a standard. In cases where there were no suitable geminal couplings present, the distance between two vicinal protons was used as the standard. Structure calculation was carried out using Crystallography & NMR System (CNS). A patch was written to modify an amide bond to a 1,4-disubstituted-1,4-(1,2,3-triazole) using known bond geometries from the Cambridge Structural Database. A survey of the ROESY spectra at high intensity gave no evidence of *cis* amide bonds as evidenced by the absence of C $_{\alpha}$ -C $_{\alpha}$  or C $_{\alpha}$ -C $_{\beta}$  couplings across residues. To further investigate the possibility of *cis-trans* isomerization of the amide bonds, additional calculations in which the amide bonds were allowed to isomerize were performed. However, no structures that matched the distance restraints were found, so the calculations were subsequently carried out using a fixed *trans* amide bond conformation. Two sets of molecular dynamic annealing calculations were performed. The first set of 50 calculations did not use rOe restraints and were performed as a control to confirm that diverse conformations were sampled during the calculations. The second set of 50 were performed using the rOe distance restraints and were used as trial structures. Those of the 50 trial structures that did not violate the rOe data by more than  $\pm 0.2$  Å (accepted structures) were used to represent the solution structure. In some cases, violations were found involving the triazole proton (HT) or the Trp sidechain (Trp HE3 and Trp HD1) with the amide backbone, and were attributed to flipping of the triazole ring or the indole side chain between two mutually exclusive structures (see Figure S1 for atom naming). Those structures in which the triazole proton or the specific Trp side chain protons have been omitted from the calculation are noted. The calculations for **7e** yielded three additional accepted structures indicative of a fast rotation of the amide bond between Trp and Lys. Though these three structures were accepted by the program, the structures were omitted due to the absence of an expected rOe between the Trp HA and the Lys HN even at high intensity.

S7.) J. C. Reubi, J. C. Schaer, B. Waser, S. Wenger, A. Heppeler, J. Schmitt, and H. R. Mäcke, *Eur. J. Nuclear Med.* **2000**, *27*, 273-282.

### Root Mean Square Deviation Calculations:

The “fit” command in MacPYMOL was used for pairwise fitting. The obtained RMSD values used for cutoffs as described in the manuscript are listed in the table below.

Fitting onto *ent-7g* used atoms PHE (C $\alpha$ , C $\beta$ ); TRP (C $\beta$ ); LYS (C $\beta$ ).

Fitting onto *ent-7f* used atoms PHE (C $\alpha$ , C $\beta$ ); TRP (backbone N, C $\beta$ ); LYS (C $\beta$ , carbonyl C); THR (C $\alpha$ ).

Fitting onto *7h* used atoms PHE (C $\alpha$ ); TRP (C $\alpha$ , C $\beta$ ); LYS (C $\alpha$ , C $\beta$ ); THR (C $\alpha$ ).

**Table S1.** Compilation of peptide RMSD values from pairfitting analyses.

| Compound      | RMSD (Å)      |               |           |
|---------------|---------------|---------------|-----------|
|               | <i>ent-7g</i> | <i>ent-7f</i> | <i>7h</i> |
| <b>7a</b>     | 0.956         | 1.014         | 0.653     |
| <b>7b</b>     | 0.602         | 0.523         | 0.983     |
| <b>7c</b>     | 0.857         | 1.136         | 0.385     |
| <b>7d</b>     | 0.392         | 0.705         | 1.407     |
| <b>7e</b>     | 0.598         | 0.464         | 0.962     |
| <b>7f</b>     | 0.759         | 0.742         | 0.650     |
| <b>7g</b>     | 0.417         | 0.701         | 1.359     |
| <b>7h</b>     | 0.830         | 1.229         | ~         |
| <i>ent-7a</i> | 0.679         | 0.509         | 0.936     |
| <i>ent-7b</i> | 0.753         | 0.810         | 0.765     |
| <i>ent-7c</i> | 0.665         | 0.562         | 1.186     |
| <i>ent-7d</i> | 0.096         | 0.984         | 0.192     |
| <i>ent-7e</i> | 0.885         | 0.961         | 0.719     |
| <i>ent-7f</i> | 0.567         | ~             | 0.952     |
| <i>ent-7g</i> | ~             | 0.938         | 0.275     |
| <i>ent-7h</i> | 0.639         | 0.581         | 1.366     |

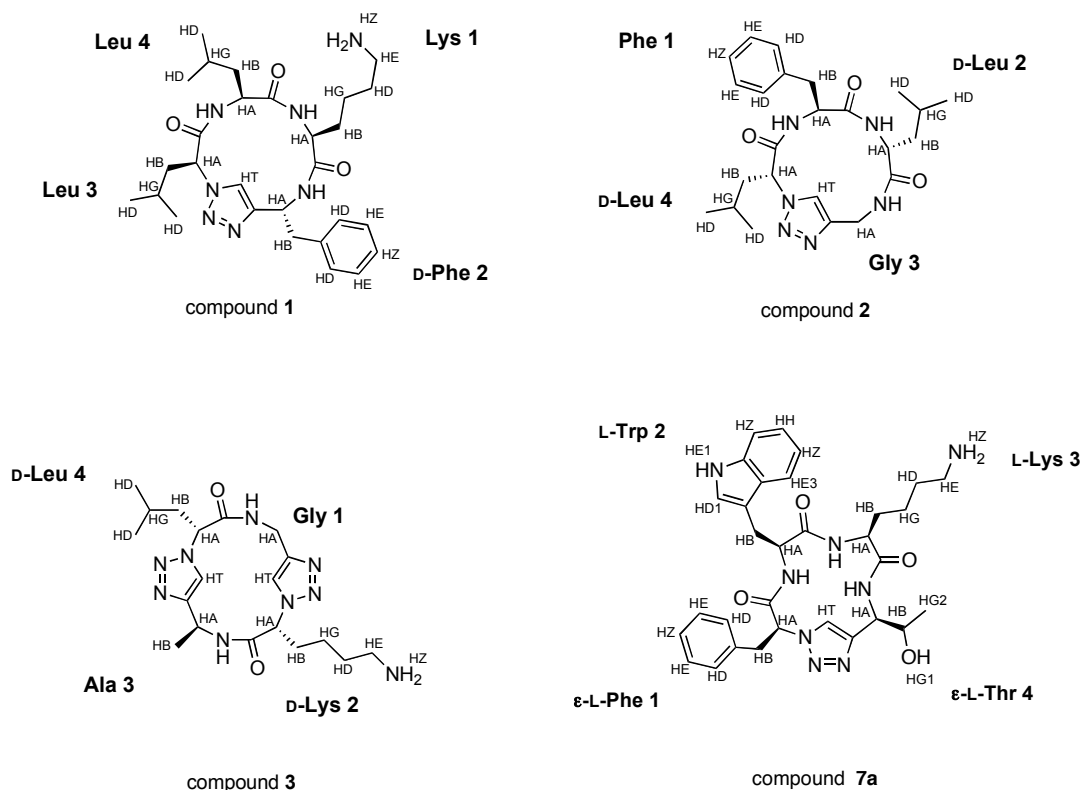

**Figure S1.** Depiction of residue numbering and atom naming for compounds 1–3 and 7a. Compounds 7a–7h and *ent-7a–ent-7h* all use the same numbering and naming scheme.

The NOE tables below report the observed rOe measurements: strong  $\leq 2.7 \text{ \AA}$ , medium  $\leq 3.5 \text{ \AA}$ , weak  $\leq 4.5 \text{ \AA}$ . The atom labels used are those used by the program NEASY; see Figure S1 for atom labelling. For compounds **7a–7h** and *ent-7a–ent-7h*, the proton THR HG1 is the threonine OH proton and was omitted from all calculations; the number of accepted structures (out of 50 possible) are shown in brackets above each table.

**Compound 1**

| Res | Atom             | Res | Atom             | NOE |
|-----|------------------|-----|------------------|-----|
| 1   | HA               | 2   | HN               | s   |
| 1   | HN               | 4   | HN               | s   |
| 2   | HB <sup>#</sup>  | 2   | HA               | s   |
| 3   | HB <sup>#</sup>  | 4   | HN               | s   |
| 3   | HB <sup>#</sup>  | 3   | HA               | s   |
| 2   | HB <sup>#</sup>  | 2   | HA               | s   |
| 2   | HB <sup>#</sup>  | 2   | HN               | s   |
| 3   | HB <sup>#</sup>  | 3   | HA               | s   |
| 3   | HB <sup>#</sup>  | 4   | HN               | s   |
| 1   | HN               | 2   | HT               | s   |
| 1   | HA               | 1   | HN               | m   |
| 3   | HB <sup>#</sup>  | 2   | HT               | m   |
| 4   | HA               | 4   | HN               | m   |
| 1   | HB <sup>#</sup>  | 1   | HA               | m   |
| 3   | HG               | 3   | HA               | m   |
| 2   | HA               | 2   | HN               | m   |
| 2   | HA               | 2   | HT               | m   |
| 2   | HA               | 2   | HB <sup>#</sup>  | m   |
| 3   | HB <sup>#</sup>  | 2   | HT               | m   |
| 2   | HB <sup>#</sup>  | 2   | HB <sup>#</sup>  | m   |
| 2   | HB <sup>#</sup>  | 2   | HB <sup>#</sup>  | m   |
| 2   | HB <sup>#</sup>  | 2   | HN               | m   |
| 3   | HA               | 2   | HT               | m   |
| 1   | HB <sup>#</sup>  | 1   | HD <sup>##</sup> | m   |
| 2   | HT               | 2   | HN               | m   |
| 3   | HD <sup>##</sup> | 3   | HA               | m   |
| 4   | HD <sup>##</sup> | 4   | HA               | m   |
| 4   | HA               | 1   | HN               | m   |
| 2   | HN               | 2   | HB <sup>#</sup>  | w   |
| 2   | HB <sup>#</sup>  | 2   | HT               | w   |
| 1   | HA               | 2   | HT               | w   |
| 1   | HA               | 4   | HA               | w   |
| 2   | HA               | 2   | HB <sup>#</sup>  | w   |
| 2   | HB <sup>#</sup>  | 2   | HT               | w   |
| 4   | HA               | 3   | HA               | w   |
| 2   | HB <sup>#</sup>  | 2   | HB <sup>#</sup>  | w   |
| 1   | HB <sup>#</sup>  | 1   | HN               | w   |
| 1   | HB <sup>#</sup>  | 1   | HD <sup>##</sup> | w   |
| 4   | HA               | 2   | HT               | w   |
| 2   | HB <sup>#</sup>  | 2   | HB <sup>#</sup>  | w   |
| 1   | HA               | 2   | HA               | w   |
| 2   | HN               | 1   | HN               | w   |
| 2   | HA               | 1   | HN               | w   |

The “#” sign indicates diastereotopic protons that were either overlapping or not stereospecifically assigned; residue numbers and atom naming used are indicated in the figure preceding NOE tables.

**Compound 2**

| Res | Atom            | Res | Atom            | NOE |
|-----|-----------------|-----|-----------------|-----|
| 2   | HN              | 1   | HA              | s   |
| 2   | HA              | 3   | HN              | s   |
| 1   | HA              | 2   | HN              | s   |
| 4   | HA              | 1   | HN              | s   |
| 3   | HA <sup>1</sup> | 3   | HN              | s   |
| 1   | HB <sup>#</sup> | 1   | HA              | s   |
| 1   | HB <sup>#</sup> | 1   | HA              | s   |
| 4   | HB <sup>#</sup> | 4   | HA              | m   |
| 2   | HB <sup>#</sup> | 2   | HA              | m   |
| 1   | HN              | 1   | HA              | m   |
| 1   | HA              | 1   | HN              | m   |
| 4   | HA              | 3   | HT              | m   |
| 1   | HB <sup>#</sup> | 1   | HN              | m   |
| 1   | HB <sup>#</sup> | 1   | HN              | m   |
| 2   | HB <sup>#</sup> | 2   | HN              | m   |
| 1   | HA              | 1   | HB <sup>#</sup> | m   |
| 2   | HB <sup>#</sup> | 2   | HA              | m   |
| 1   | HB <sup>#</sup> | 1   | HA              | m   |
| 2   | HG              | 2   | HA              | m   |
| 4   | HG              | 4   | HA              | m   |
| 3   | HT              | 1   | HN              | m   |
| 2   | HB <sup>#</sup> | 2   | HA              | m   |
| 3   | HT              | 3   | HA <sup>2</sup> | w   |
| 4   | HB <sup>#</sup> | 4   | HA              | w   |
| 2   | HG              | 2   | HN              | w   |
| 4   | HB <sup>#</sup> | 3   | HT              | w   |
| 3   | HA <sup>1</sup> | 3   | HT              | w   |
| 1   | HA              | 2   | HA              | w   |
| 2   | HA              | 3   | HT              | w   |
| 1   | HA              | 1   | HB <sup>#</sup> | w   |
| 1   | HB <sup>#</sup> | 1   | HN              | w   |

Glycine protons HA<sup>1</sup> and HA<sup>2</sup> are pro-(*S*) and pro-(*R*) respectively; the “#” sign indicates diastereotopic protons that were either overlapping or not stereospecifically assigned; residue numbers and atom naming used are indicated in the figure preceding NOE tables.

**Compound 3**

| Res | Atom            | Res | Atom            | NOE |
|-----|-----------------|-----|-----------------|-----|
| 3   | HN              | 2   | HA              | s   |
| 4   | HA              | 1   | HN              | s   |
| 1   | HA <sup>1</sup> | 1   | HN              | s   |
| 3   | HT              | 3   | HA              | m   |
| 1   | HA <sup>2</sup> | 1   | HT              | m   |
| 2   | HE <sup>#</sup> | 2   | HZ <sup>#</sup> | m   |
| 3   | HN              | 3   | HA              | m   |
| 4   | HA              | 3   | HT              | m   |
| 1   | HA <sup>2</sup> | 1   | HN              | m   |
| 4   | HG              | 4   | HA              | m   |
| 3   | HB <sup>#</sup> | 3   | HN              | m   |
| 3   | HT5             | 4   | HA              | m   |
| 4   | HD <sup>#</sup> | 4   | HA              | m   |
| 1   | HT              | 2   | HA              | m   |
| 2   | HD <sup>#</sup> | 2   | HZ <sup>#</sup> | w   |
| 1   | HN              | 3   | HT              | w   |
| 3   | HN              | 3   | HT              | w   |
| 3   | HN              | 1   | HT              | w   |
| 1   | HN              | 1   | HT              | w   |
| 1   | HA <sup>1</sup> | 1   | HT              | w   |

Glycine protons HA<sup>1</sup> and HA<sup>2</sup> are pro-(*S*) and pro-(*R*) respectively; the “#” sign indicates diastereotopic protons that were either overlapping or not stereospecifically assigned; residue numbers and atom naming used are indicated in the figure preceding NOE tables.

**Compound 7a**

*cyclo*[1,4-(1,2,3-triazole)-L-Phe-L-Trp-L-Lys-L-Thr]

Accepted structures: [30/50]

| prot             | res | Hs  | prot | res             | Hs | integration | corrected | calc dist |            |     |     |
|------------------|-----|-----|------|-----------------|----|-------------|-----------|-----------|------------|-----|-----|
| HB               | 3   | LYS | 1    | HB              | 3  | LYS         | 1         | 405600    | 405600     | 1.8 | 2.7 |
| HB               | 4   | THR | 1    | HG1             | 4  | THR         | 1         | 163900    | 163900     | 2.0 | 2.7 |
| HB               | 1   | PHE | 1    | HA              | 1  | PHE         | 1         | 109600    | 109600     | 2.2 | 2.7 |
| HB               | 1   | PHE | 1    | HN              | 2  | TRP         | 1         | 108200    | 108200     | 2.2 | 2.7 |
| HB <sup>#</sup>  | 2   | TRP | 2    | HA              | 2  | TRP         | 1         | 197100    | 98550      | 2.2 | 2.7 |
| HB               | 1   | PHE | 1    | HA              | 1  | PHE         | 1         | 84720     | 84720      | 2.3 | 2.7 |
| HA               | 3   | LYS | 1    | HN              | 3  | LYS         | 1         | 76190     | 76190      | 2.3 | 2.7 |
| HB               | 2   | TRP | 1    | HE3             | 2  | TRP         | 1         | 72630     | 72630      | 2.3 | 2.7 |
| HB               | 1   | PHE | 1    | HN              | 2  | TRP         | 1         | 71270     | 71270      | 2.4 | 2.7 |
| HB               | 3   | LYS | 1    | HA              | 3  | LYS         | 1         | 65790     | 65790      | 2.4 | 2.7 |
| HN               | 2   | TRP | 1    | HN              | 3  | LYS         | 1         | 61840     | 61840      | 2.4 | 2.7 |
| HA               | 3   | LYS | 1    | HN              | 4  | THR         | 1         | 60120     | 60120      | 2.4 | 2.7 |
| HT               | 4   | THR | 1    | HN              | 2  | TRP         | 1         | 59640     | 59640      | 2.4 | 2.7 |
| HA               | 2   | TRP | 1    | HN              | 3  | LYS         | 1         | 58740     | 58740      | 2.4 | 2.7 |
| HB               | 3   | LYS | 1    | HA              | 3  | LYS         | 1         | 57200     | 57200      | 2.4 | 2.7 |
| HG2 <sup>#</sup> | 4   | THR | 3    | HB              | 4  | THR         | 1         | 169600    | 56533.3333 | 2.4 | 2.7 |
| HA               | 2   | TRP | 1    | HD1             | 2  | TRP         | 1         | 55440     | 55440      | 2.5 | 2.7 |
| HA               | 2   | TRP | 1    | HE3             | 2  | TRP         | 1         | 53630     | 53630      | 2.5 | 2.7 |
| HA               | 4   | THR | 1    | HN              | 4  | THR         | 1         | 50740     | 50740      | 2.5 | 2.7 |
| HB               | 1   | PHE | 1    | HT              | 4  | THR         | 1         | 50270     | 50270      | 2.5 | 2.7 |
| HB               | 1   | PHE | 1    | HT              | 4  | THR         | 1         | 44620     | 44620      | 2.5 | 2.7 |
| HG <sup>#</sup>  | 3   | LYS | 2    | HA              | 3  | LYS         | 1         | 84780     | 42390      | 2.6 | 2.7 |
| HB <sup>#</sup>  | 2   | TRP | 2    | HN              | 2  | TRP         | 1         | 81560     | 40780      | 2.6 | 2.7 |
| HA               | 1   | PHE | 1    | HD <sup>#</sup> | 1  | PHE         | 2         | 77870     | 38935      | 2.6 | 2.7 |
| HA               | 1   | PHE | 1    | HT              | 4  | THR         | 1         | 36420     | 36420      | 2.6 | 2.7 |
| HG2 <sup>#</sup> | 4   | THR | 3    | HA              | 4  | THR         | 1         | 107400    | 35800      | 2.6 | 2.7 |
| HA               | 2   | TRP | 1    | HN              | 2  | TRP         | 1         | 35460     | 35460      | 2.6 | 2.7 |
| HB               | 1   | PHE | 1    | HD <sup>#</sup> | 1  | PHE         | 2         | 70130     | 35065      | 2.6 | 2.7 |
| HT               | 4   | THR | 1    | HN              | 3  | LYS         | 1         | 34520     | 34520      | 2.7 | 2.7 |
| HB               | 1   | PHE | 1    | HD <sup>#</sup> | 1  | PHE         | 2         | 67350     | 33675      | 2.7 | 2.7 |
| HB <sup>#</sup>  | 2   | TRP | 2    | HN              | 3  | LYS         | 1         | 61460     | 30730      | 2.7 | 2.7 |
| HB <sup>#</sup>  | 2   | TRP | 2    | HD1             | 2  | TRP         | 1         | 58030     | 29015      | 2.7 | 2.7 |
| HG2 <sup>#</sup> | 4   | THR | 3    | HG1             | 4  | THR         | 1         | 85630     | 28543.3333 | 2.7 | 2.7 |
| HE <sup>#</sup>  | 3   | LYS | 2    | HZ <sup>#</sup> | 3  | LYS         | 3         | 134500    | 22416.6667 | 2.9 | 3.5 |
| HB               | 3   | LYS | 1    | HN              | 4  | THR         | 1         | 20920     | 20920      | 2.9 | 3.5 |
| HB               | 3   | LYS | 1    | HN              | 3  | LYS         | 1         | 19850     | 19850      | 2.9 | 3.5 |
| HD <sup>#</sup>  | 3   | LYS | 2    | HA              | 3  | LYS         | 1         | 38550     | 19275      | 2.9 | 3.5 |
| HB               | 3   | LYS | 1    | HN              | 4  | THR         | 1         | 17900     | 17900      | 3.0 | 3.5 |
| HA               | 4   | THR | 1    | HG1             | 4  | THR         | 1         | 17440     | 17440      | 3.0 | 3.5 |
| HB               | 4   | THR | 1    | HN              | 4  | THR         | 1         | 15230     | 15230      | 3.0 | 3.5 |
| HT               | 4   | THR | 1    | HN              | 4  | THR         | 1         | 13530     | 13530      | 3.1 | 3.5 |
| HD <sup>#</sup>  | 3   | LYS | 2    | HZ <sup>#</sup> | 3  | LYS         | 3         | 54820     | 9136.66667 | 3.3 | 3.5 |
| HB               | 3   | LYS | 1    | HN              | 3  | LYS         | 1         | 6034      | 6034       | 3.5 | 3.5 |

The triazole HT, Trp HE3, and Trp HD1 protons were omitted from calculations for this peptide. The “#” signs indicates diastereotopic protons that were either overlapping or not stereospecifically assigned.

**Compound 7b**

*cyclo*[1,4-(1,2,3-triazole)-D-Phe-L-Trp-L-Lys-L-Thr]

Accepted structures: [28/50]

| prot             | res | Hs  | prot | res             | Hs | integration | corrected | calc dist |             |     |     |
|------------------|-----|-----|------|-----------------|----|-------------|-----------|-----------|-------------|-----|-----|
| HB               | 2   | TRP | 1    | HB              | 2  | TRP         | 1         | 1163000   | 1163000     | 1.8 | 2.7 |
| HB               | 3   | LYS | 1    | HB              | 3  | LYS         | 1         | 773700    | 773700      | 1.9 | 2.7 |
| HA               | 1   | PHE | 1    | HN              | 2  | TRP         | 1         | 499100    | 499100      | 2.0 | 2.7 |
| HB               | 4   | THR | 1    | HA              | 4  | THR         | 1         | 355000    | 355000      | 2.1 | 2.7 |
| HB               | 4   | THR | 1    | HG1             | 4  | THR         | 1         | 289000    | 289000      | 2.2 | 2.7 |
| HA               | 1   | PHE | 1    | HT              | 4  | THR         | 1         | 232600    | 232600      | 2.3 | 2.7 |
| HA               | 3   | LYS | 1    | HN              | 3  | LYS         | 1         | 222500    | 222500      | 2.3 | 2.7 |
| HA               | 2   | TRP | 1    | HN              | 3  | LYS         | 1         | 218300    | 218300      | 2.3 | 2.7 |
| HB <sup>#</sup>  | 1   | PHE | 2    | HA              | 1  | PHE         | 1         | 427100    | 213550      | 2.3 | 2.7 |
| HB               | 2   | TRP | 1    | HA              | 2  | TRP         | 1         | 208900    | 208900      | 2.3 | 2.7 |
| HB               | 2   | TRP | 1    | HA              | 2  | TRP         | 1         | 201400    | 201400      | 2.4 | 2.7 |
| HA               | 2   | TRP | 1    | HD1             | 2  | TRP         | 1         | 160500    | 160500      | 2.4 | 2.7 |
| HB               | 2   | TRP | 1    | HN              | 2  | TRP         | 1         | 142800    | 142800      | 2.5 | 2.7 |
| HA               | 4   | THR | 1    | HN              | 4  | THR         | 1         | 138200    | 138200      | 2.5 | 2.7 |
| HG2 <sup>#</sup> | 4   | THR | 3    | HB              | 4  | THR         | 1         | 385800    | 128600      | 2.5 | 2.7 |
| HB               | 3   | LYS | 1    | HA              | 3  | LYS         | 1         | 114800    | 114800      | 2.6 | 2.7 |
| HB               | 3   | LYS | 1    | HA              | 3  | LYS         | 1         | 113400    | 113400      | 2.6 | 2.7 |
| HB               | 2   | TRP | 1    | HD1             | 2  | TRP         | 1         | -108900   | 108900      | 2.6 | 2.7 |
| HN               | 4   | THR | 1    | HT              | 4  | THR         | 1         | 100500    | 100500      | 2.6 | 2.7 |
| HB               | 3   | LYS | 1    | HN              | 4  | THR         | 1         | 98600     | 98600       | 2.7 | 2.7 |
| HB               | 3   | LYS | 1    | HN              | 4  | THR         | 1         | 98120     | 98120       | 2.7 | 2.7 |
| HB               | 2   | TRP | 1    | HE3             | 2  | TRP         | 1         | 93620     | 93620       | 2.7 | 2.7 |
| HT               | 4   | THR | 1    | HN              | 2  | TRP         | 1         | 90120     | 90120       | 2.7 | 2.7 |
| HB               | 2   | TRP | 1    | HN              | 2  | TRP         | 1         | 90100     | 90100       | 2.7 | 2.7 |
| HA               | 1   | PHE | 1    | HD <sup>#</sup> | 1  | PHE         | 2         | 176400    | 88200       | 2.7 | 2.7 |
| HD1              | 2   | TRP | 1    | HE1             | 2  | TRP         | 1         | 86890     | 86890       | 2.7 | 2.7 |
| HB <sup>#</sup>  | 1   | PHE | 2    | HD <sup>#</sup> | 1  | PHE         | 2         | 344700    | 86175       | 2.7 | 2.7 |
| HG2 <sup>#</sup> | 4   | THR | 3    | HA              | 4  | THR         | 1         | 254000    | 84666.66667 | 2.7 | 2.7 |
| HA               | 2   | TRP | 1    | HE3             | 2  | TRP         | 1         | 82210     | 82210       | 2.7 | 2.7 |
| HA               | 2   | TRP | 1    | HN              | 2  | TRP         | 1         | 81220     | 81220       | 2.7 | 2.7 |
| HN               | 3   | LYS | 1    | HN              | 2  | TRP         | 1         | 75710     | 75710       | 2.8 | 3.5 |
| HG <sup>#</sup>  | 3   | LYS | 2    | HA              | 3  | LYS         | 1         | 146000    | 73000       | 2.8 | 3.5 |
| HD <sup>#</sup>  | 3   | LYS | 2    | HE <sup>#</sup> | 3  | LYS         | 2         | 278100    | 69525       | 2.8 | 3.5 |
| HN               | 4   | THR | 1    | HN              | 3  | LYS         | 1         | 66950     | 66950       | 2.8 | 3.5 |
| HA               | 3   | LYS | 1    | HN              | 4  | THR         | 1         | 63940     | 63940       | 2.9 | 3.5 |
| HB               | 4   | THR | 1    | HN              | 4  | THR         | 1         | 61770     | 61770       | 2.9 | 3.5 |
| HN               | 3   | LYS | 1    | HT              | 4  | THR         | 1         | 58560     | 58560       | 2.9 | 3.5 |
| HB               | 2   | TRP | 1    | HE3             | 2  | TRP         | 1         | 51980     | 51980       | 3.0 | 3.5 |
| HG <sup>#</sup>  | 3   | LYS | 2    | HB              | 3  | LYS         | 1         | 97700     | 48850       | 3.0 | 3.5 |
| HB               | 2   | TRP | 1    | HD1             | 2  | TRP         | 1         | 45780     | 45780       | 3.0 | 3.5 |
| HG <sup>#</sup>  | 3   | LYS | 2    | HB              | 3  | LYS         | 1         | 91350     | 45675       | 3.0 | 3.5 |
| HG <sup>#</sup>  | 3   | LYS | 2    | HD <sup>#</sup> | 3  | LYS         | 2         | 181100    | 45275       | 3.0 | 3.5 |
| HB               | 4   | THR | 1    | HT              | 4  | THR         | 1         | 38240     | 38240       | 3.1 | 3.5 |
| HG <sup>#</sup>  | 3   | LYS | 2    | HE <sup>#</sup> | 3  | LYS         | 2         | 149100    | 37275       | 3.1 | 3.5 |
| HE <sup>#</sup>  | 3   | LYS | 2    | HZ <sup>#</sup> | 3  | LYS         | 3         | 210500    | 35083.33333 | 3.2 | 3.5 |
| HG2 <sup>#</sup> | 4   | THR | 3    | HG1             | 4  | THR         | 1         | 86020     | 28673.33333 | 3.3 | 3.5 |
| HD <sup>#</sup>  | 3   | LYS | 2    | HA              | 3  | LYS         | 1         | 49690     | 24845       | 3.3 | 3.5 |
| HG1              | 4   | THR | 1    | HT              | 4  | THR         | 1         | 22200     | 22200       | 3.4 | 3.5 |
| HZ2              | 2   | TRP | 1    | HE1             | 2  | TRP         | 1         | 17920     | 17920       | 3.5 | 3.5 |
| HB <sup>#</sup>  | 1   | PHE | 2    | HT              | 4  | THR         | 1         | 28540     | 14270       | 3.7 | 4.5 |
| HA               | 4   | THR | 1    | HT              | 4  | THR         | 1         | 12180     | 12180       | 3.8 | 4.5 |
| HD <sup>#</sup>  | 3   | LYS | 2    | HZ <sup>#</sup> | 3  | LYS         | 3         | 53100     | 8850        | 4.0 | 4.5 |
| HB               | 2   | TRP | 1    | HN              | 3  | LYS         | 1         | 8810      | 8810        | 4.0 | 4.5 |

The triazole HT proton was omitted from calculations for this peptide. The “#” signs indicates diastereotopic protons that were either overlapping or not stereospecifically assigned.

**Compound 7c**

*cyclo*[1,4-(1,2,3-triazole)-L-Phe-D-Trp-L-Lys-L-Thr]

Accepted structures: [18/50]

| prot             | res | Hs  | prot | res             | Hs | integration | corrected | calc dist |             |     |     |
|------------------|-----|-----|------|-----------------|----|-------------|-----------|-----------|-------------|-----|-----|
| HB               | 2   | TRP | 1    | HB              | 2  | TRP         | 1         | -4613000  | 4613000     | 1.8 | 2.7 |
| HB               | 1   | PHE | 1    | HB              | 1  | PHE         | 1         | -4220000  | 4220000     | 1.8 | 2.7 |
| HA               | 2   | TRP | 1    | HN              | 3  | LYS         | 1         | -1416000  | 1416000     | 2.1 | 2.7 |
| HA               | 1   | PHE | 1    | HN              | 2  | TRP         | 1         | -1259000  | 1259000     | 2.2 | 2.7 |
| HB               | 4   | THR | 1    | HA              | 4  | THR         | 1         | -883400   | 883400      | 2.3 | 2.7 |
| HB               | 3   | LYS | 1    | HA              | 3  | LYS         | 1         | -658200   | 658200      | 2.4 | 2.7 |
| HB               | 1   | PHE | 1    | HA              | 1  | PHE         | 1         | -614700   | 614700      | 2.5 | 2.7 |
| HB               | 2   | TRP | 1    | HA              | 2  | TRP         | 1         | -543100   | 543100      | 2.5 | 2.7 |
| HN               | 4   | THR | 1    | HT              | 4  | THR         | 1         | -480100   | 480100      | 2.6 | 2.7 |
| HB               | 4   | THR | 1    | HN              | 4  | THR         | 1         | -469600   | 469600      | 2.6 | 2.7 |
| HB               | 1   | PHE | 1    | HA              | 1  | PHE         | 1         | -449100   | 449100      | 2.6 | 2.7 |
| HN               | 4   | THR | 1    | HN              | 3  | LYS         | 1         | -421500   | 421500      | 2.6 | 2.7 |
| HB               | 3   | LYS | 1    | HA              | 3  | LYS         | 1         | -392500   | 392500      | 2.7 | 2.7 |
| HB               | 2   | TRP | 1    | HA              | 2  | TRP         | 1         | -369000   | 369000      | 2.7 | 2.7 |
| HA               | 4   | THR | 1    | HN              | 4  | THR         | 1         | -351600   | 351600      | 2.7 | 2.7 |
| HB               | 3   | LYS | 1    | HN              | 3  | LYS         | 1         | -289100   | 289100      | 2.8 | 3.5 |
| HA               | 2   | TRP | 1    | HE3             | 2  | TRP         | 1         | -274400   | 274400      | 2.8 | 3.5 |
| HA               | 2   | TRP | 1    | HD1             | 2  | TRP         | 1         | -263300   | 263300      | 2.8 | 3.5 |
| HB               | 3   | LYS | 1    | HN              | 4  | THR         | 1         | -253400   | 253400      | 2.9 | 3.5 |
| HB               | 3   | LYS | 1    | HN              | 4  | THR         | 1         | -242500   | 242500      | 2.9 | 3.5 |
| HD1              | 2   | TRP | 1    | HE1             | 2  | TRP         | 1         | -235400   | 235400      | 2.9 | 3.5 |
| HA               | 2   | TRP | 1    | HN              | 2  | TRP         | 1         | -223300   | 223300      | 2.9 | 3.5 |
| HG2 <sup>#</sup> | 4   | THR | 3    | HA              | 4  | THR         | 1         | -666600   | 222200      | 2.9 | 3.5 |
| HA               | 2   | TRP | 1    | HT              | 4  | THR         | 1         | -211800   | 211800      | 2.9 | 3.5 |
| HB               | 2   | TRP | 1    | HN              | 2  | TRP         | 1         | -210100   | 210100      | 2.9 | 3.5 |
| HA               | 1   | PHE | 1    | HD <sup>#</sup> | 1  | PHE         | 2         | -345300   | 172650      | 3.0 | 3.5 |
| HB               | 2   | TRP | 1    | HE3             | 2  | TRP         | 1         | -169900   | 169900      | 3.1 | 3.5 |
| HB               | 3   | LYS | 1    | HN              | 3  | LYS         | 1         | -169000   | 169000      | 3.1 | 3.5 |
| HB               | 2   | TRP | 1    | HN              | 2  | TRP         | 1         | -167400   | 167400      | 3.1 | 3.5 |
| HB               | 2   | TRP | 1    | HD1             | 2  | TRP         | 1         | -164600   | 164600      | 3.1 | 3.5 |
| HA               | 1   | PHE | 1    | HT              | 4  | THR         | 1         | -160400   | 160400      | 3.1 | 3.5 |
| HT               | 4   | THR | 1    | HN              | 3  | LYS         | 1         | -152800   | 152800      | 3.1 | 3.5 |
| HB               | 1   | PHE | 1    | HD <sup>#</sup> | 1  | PHE         | 2         | -300900   | 150450      | 3.1 | 3.5 |
| HB               | 1   | PHE | 1    | HD <sup>#</sup> | 1  | PHE         | 2         | -270500   | 135250      | 3.2 | 3.5 |
| HB               | 2   | TRP | 1    | HE3             | 2  | TRP         | 1         | -129600   | 129600      | 3.2 | 3.5 |
| HB               | 1   | PHE | 1    | HT              | 4  | THR         | 1         | -125200   | 125200      | 3.2 | 3.5 |
| HG <sup>#</sup>  | 3   | LYS | 2    | HB              | 3  | LYS         | 1         | -246000   | 123000      | 3.2 | 3.5 |
| HB               | 4   | THR | 1    | HT              | 4  | THR         | 1         | -106200   | 106200      | 3.3 | 3.5 |
| HB               | 3   | LYS | 1    | HN              | 3  | LYS         | 1         | -104100   | 104100      | 3.3 | 3.5 |
| HB               | 2   | TRP | 1    | HD1             | 2  | TRP         | 1         | -90500    | 90500       | 3.4 | 3.5 |
| HG <sup>#</sup>  | 3   | LYS | 2    | HE <sup>#</sup> | 3  | LYS         | 2         | -349300   | 87325       | 3.4 | 3.5 |
| HB               | 1   | PHE | 1    | HT              | 4  | THR         | 1         | -80050    | 80050       | 3.5 | 3.5 |
| HE <sup>#</sup>  | 3   | LYS | 2    | HZ <sup>#</sup> | 3  | LYS         | 3         | -470700   | 78450       | 3.5 | 3.5 |
| HZ2              | 2   | TRP | 1    | HE1             | 2  | TRP         | 1         | -56400    | 56400       | 3.7 | 4.5 |
| HD <sup>#</sup>  | 3   | LYS | 2    | HZ <sup>#</sup> | 3  | LYS         | 3         | -313400   | 52233.33333 | 3.7 | 4.5 |
| HT               | 4   | THR | 1    | HN              | 2  | TRP         | 1         | -50380    | 50380       | 3.7 | 4.5 |
| HG2 <sup>#</sup> | 4   | THR | 3    | HN              | 4  | THR         | 1         | -126200   | 42066.66667 | 3.9 | 4.5 |
| HG <sup>#</sup>  | 3   | LYS | 2    | HZ <sup>#</sup> | 3  | LYS         | 3         | -31570    | 5261.66667  | 5.4 | 4.5 |

The triazole HT proton was omitted from calculations for this peptide. The “#” signs indicates diastereotopic protons that were either overlapping or not stereospecifically assigned.



**Compound 7d**
*cyclo*[1,4-(1,2,3-triazole)-L-Phe-L-Trp-D-Lys-L-Thr]

Accepted structures: [40/50]

| <u>prot</u>      |   | <u>res</u> | <u>Hs</u> | <u>prot</u>     |   | <u>res</u> | <u>Hs</u> | <u>integration</u> | <u>corrected</u> | <u>calc dist</u> |     |
|------------------|---|------------|-----------|-----------------|---|------------|-----------|--------------------|------------------|------------------|-----|
| HB               | 1 | PHE        | 1         | HB              | 1 | PHE        | 1         | -1440000           | -1440000         | 1.8              | 2.7 |
| HA               | 3 | LYS        | 1         | HN              | 4 | THR        | 1         | -763400            | -763400          | 2.0              | 2.7 |
| HA               | 2 | TRP        | 1         | HN              | 3 | LYS        | 1         | -614500            | -614500          | 2.0              | 2.7 |
| HB               | 4 | THR        | 1         | HA              | 4 | THR        | 1         | -471800            | -471800          | 2.1              | 2.7 |
| HB               | 1 | PHE        | 1         | HA              | 1 | PHE        | 1         | -322800            | -322800          | 2.3              | 2.7 |
| HB               | 1 | PHE        | 1         | HN              | 2 | TRP        | 1         | -298200            | -298200          | 2.3              | 2.7 |
| HB               | 3 | LYS        | 1         | HA              | 3 | LYS        | 1         | -197300            | -197300          | 2.5              | 2.7 |
| HB               | 3 | LYS        | 1         | HA              | 3 | LYS        | 1         | -194800            | -194800          | 2.5              | 2.7 |
| HB               | 2 | TRP        | 1         | HA              | 2 | TRP        | 1         | -188800            | -188800          | 2.5              | 2.7 |
| HB               | 2 | TRP        | 1         | HA              | 2 | TRP        | 1         | -185200            | -185200          | 2.5              | 2.7 |
| HT               | 4 | THR        | 1         | HN              | 2 | TRP        | 1         | -165100            | -165100          | 2.5              | 2.7 |
| HB               | 1 | PHE        | 1         | HN              | 2 | TRP        | 1         | -154400            | -154400          | 2.6              | 2.7 |
| HB               | 1 | PHE        | 1         | HA              | 1 | PHE        | 1         | -153900            | -153900          | 2.6              | 2.7 |
| HB               | 3 | LYS        | 1         | HN              | 3 | LYS        | 1         | -148100            | -148100          | 2.6              | 2.7 |
| HA               | 2 | TRP        | 1         | HD1             | 2 | TRP        | 1         | -141400            | -141400          | 2.6              | 2.7 |
| HG2 <sup>#</sup> | 4 | THR        | 3         | HB              | 4 | THR        | 1         | -417600            | -139200          | 2.6              | 2.7 |
| HN               | 4 | THR        | 1         | HT              | 4 | THR        | 1         | -120500            | -120500          | 2.7              | 2.7 |
| HB               | 4 | THR        | 1         | HN              | 4 | THR        | 1         | -113100            | -113100          | 2.7              | 2.7 |
| HG <sup>#</sup>  | 3 | LYS        | 2         | HA              | 3 | LYS        | 1         | -222300            | -111150          | 2.7              | 2.7 |
| HG2 <sup>#</sup> | 4 | THR        | 3         | HA              | 4 | THR        | 1         | -315800            | -105266.6667     | 2.7              | 2.7 |
| HB               | 1 | PHE        | 1         | HT              | 4 | THR        | 1         | -102900            | -102900          | 2.7              | 2.7 |
| HD1              | 2 | TRP        | 1         | HE1             | 2 | TRP        | 1         | -98960             | -98960           | 2.7              | 2.7 |
| HB               | 2 | TRP        | 1         | HN              | 2 | TRP        | 1         | -96790             | -96790           | 2.8              | 3.5 |
| HB               | 2 | TRP        | 1         | HE3             | 2 | TRP        | 1         | -93710             | -93710           | 2.8              | 3.5 |
| HB               | 2 | TRP        | 1         | HD1             | 2 | TRP        | 1         | -84820             | -84820           | 2.8              | 3.5 |
| HB               | 1 | PHE        | 1         | HT              | 4 | THR        | 1         | -83900             | -83900           | 2.8              | 3.5 |
| HB               | 1 | PHE        | 1         | HD <sup>#</sup> | 1 | PHE        | 2         | -161900            | -80950           | 2.8              | 3.5 |
| HA               | 2 | TRP        | 1         | HE3             | 2 | TRP        | 1         | -79540             | -79540           | 2.9              | 3.5 |
| HB               | 3 | LYS        | 1         | HE <sup>#</sup> | 3 | LYS        | 2         | -143700            | -71850           | 2.9              | 3.5 |
| HA               | 4 | THR        | 1         | HN              | 4 | THR        | 1         | -70980             | -70980           | 2.9              | 3.5 |
| HA               | 1 | PHE        | 1         | HD <sup>#</sup> | 1 | PHE        | 2         | -140100            | -70050           | 2.9              | 3.5 |
| HB               | 1 | PHE        | 1         | HD <sup>#</sup> | 1 | PHE        | 2         | -137800            | -68900           | 2.9              | 3.5 |
| HB               | 3 | LYS        | 1         | HN              | 3 | LYS        | 1         | -65630             | -65630           | 2.9              | 3.5 |
| HB               | 2 | TRP        | 1         | HN              | 2 | TRP        | 1         | -64990             | -64990           | 2.9              | 3.5 |
| HA               | 2 | TRP        | 1         | HN              | 2 | TRP        | 1         | -64160             | -64160           | 3.0              | 3.5 |
| HA               | 3 | LYS        | 1         | HN              | 3 | LYS        | 1         | -56330             | -56330           | 3.0              | 3.5 |
| HA               | 1 | PHE        | 1         | HN              | 2 | TRP        | 1         | -54450             | -54450           | 3.0              | 3.5 |
| HD <sup>#</sup>  | 3 | LYS        | 2         | HE <sup>#</sup> | 3 | LYS        | 2         | -217200            | -54300           | 3.0              | 3.5 |
| HE <sup>#</sup>  | 3 | LYS        | 2         | HZ <sup>#</sup> | 3 | LYS        | 3         | -281700            | -46950           | 3.1              | 3.5 |
| HG <sup>#</sup>  | 3 | LYS        | 2         | HB              | 3 | LYS        | 1         | -84560             | -42280           | 3.2              | 3.5 |
| HB               | 2 | TRP        | 1         | HE3             | 2 | TRP        | 1         | -41570             | -41570           | 3.2              | 3.5 |
| HA               | 1 | PHE        | 1         | HT              | 4 | THR        | 1         | -35600             | -35600           | 3.3              | 3.5 |
| HB               | 4 | THR        | 1         | HT              | 4 | THR        | 1         | -34120             | -34120           | 3.3              | 3.5 |
| HG <sup>#</sup>  | 3 | LYS        | 2         | HE <sup>#</sup> | 3 | LYS        | 2         | -124000            | -31000           | 3.3              | 3.5 |
| HB               | 2 | TRP        | 1         | HD1             | 2 | TRP        | 1         | -29980             | -29980           | 3.4              | 3.5 |
| HG <sup>#</sup>  | 3 | LYS        | 2         | HN              | 3 | LYS        | 1         | -56180             | -28090           | 3.4              | 3.5 |
| HA               | 4 | THR        | 1         | HT              | 4 | THR        | 1         | -25070             | -25070           | 3.5              | 3.5 |
| HG <sup>#</sup>  | 3 | LYS        | 2         | HD <sup>#</sup> | 3 | LYS        | 2         | -96610             | -24152.5         | 3.5              | 3.5 |
| HG2 <sup>#</sup> | 4 | THR        | 3         | HN              | 4 | THR        | 1         | -64520             | -21506.66667     | 3.5              | 3.5 |
| HD <sup>#</sup>  | 3 | LYS        | 2         | HZ <sup>#</sup> | 3 | LYS        | 3         | -108200            | -18033.33333     | 3.7              | 4.5 |

The triazole HT, Trp HE3, and Trp HD1 protons were omitted from calculations for this peptide. The “#” signs indicates diastereotopic protons that were either overlapping or not stereospecifically assigned.

**Compound 7e***cyclo*[1,4-(1,2,3-triazole)-D-Phe-D-Trp-D-Lys-L-Thr]

Accepted structures: [27/50]

| <u>prot</u>      |   | <u>res</u> | <u>Hs</u> | <u>prot</u>     |   | <u>res</u> | <u>Hs</u> | <u>integration</u> | <u>corrected</u> | <u>calc dist</u> |     |
|------------------|---|------------|-----------|-----------------|---|------------|-----------|--------------------|------------------|------------------|-----|
| HB               | 1 | PHE        | 1         | HB              | 1 | PHE        | 1         | 194300             | 194300           | 1.8              | 2.7 |
| HB               | 3 | LYS        | 1         | HB              | 3 | LYS        | 1         | 68260              | 68260            | 2.1              | 2.7 |
| HB               | 4 | THR        | 1         | HA              | 4 | THR        | 1         | 63260              | 63260            | 2.1              | 2.7 |
| HA               | 3 | LYS        | 1         | HN              | 4 | THR        | 1         | 53700              | 53700            | 2.2              | 2.7 |
| HB               | 1 | PHE        | 1         | HA              | 1 | PHE        | 1         | 33110              | 33110            | 2.4              | 2.7 |
| HN               | 3 | LYS        | 1         | HN              | 2 | TRP        | 1         | 28430              | 28430            | 2.4              | 2.7 |
| HB <sup>#</sup>  | 2 | TRP        | 2         | HN              | 2 | TRP        | 1         | 50420              | 25210            | 2.5              | 2.7 |
| HB <sup>#</sup>  | 2 | TRP        | 2         | HA              | 2 | TRP        | 1         | 42970              | 21485            | 2.5              | 2.7 |
| HB               | 4 | THR        | 1         | HN              | 4 | THR        | 1         | 19940              | 19940            | 2.6              | 2.7 |
| HB               | 3 | LYS        | 1         | HA              | 3 | LYS        | 1         | 16710              | 16710            | 2.6              | 2.7 |
| HA               | 4 | THR        | 1         | HN              | 4 | THR        | 1         | 15720              | 15720            | 2.7              | 2.7 |
| HG2 <sup>#</sup> | 4 | THR        | 3         | HA              | 4 | THR        | 1         | 38260              | 12753.33333      | 2.8              | 3.5 |
| HB               | 3 | LYS        | 1         | HA              | 3 | LYS        | 1         | 11340              | 11340            | 2.8              | 3.5 |
| HB               | 1 | PHE        | 1         | HD <sup>#</sup> | 1 | PHE        | 2         | 21440              | 10720            | 2.9              | 3.5 |
| HG2 <sup>#</sup> | 4 | THR        | 3         | HB              | 4 | THR        | 1         | 30530              | 10176.66667      | 2.9              | 3.5 |
| HA               | 1 | PHE        | 1         | HD <sup>#</sup> | 1 | PHE        | 2         | 19560              | 9780             | 2.9              | 3.5 |
| HA               | 3 | LYS        | 1         | HN              | 3 | LYS        | 1         | 9547               | 9547             | 2.9              | 3.5 |
| HG <sup>#</sup>  | 3 | LYS        | 2         | HA              | 3 | LYS        | 1         | 17760              | 8880             | 2.9              | 3.5 |
| HB <sup>#</sup>  | 2 | TRP        | 2         | HN              | 3 | LYS        | 1         | 16440              | 8220             | 3.0              | 3.5 |
| HA               | 1 | PHE        | 1         | HT              | 4 | THR        | 1         | 8172               | 8172             | 3.0              | 3.5 |
| HB               | 1 | PHE        | 1         | HA              | 1 | PHE        | 1         | 7462               | 7462             | 3.0              | 3.5 |
| HT               | 4 | THR        | 1         | HN              | 4 | THR        | 1         | 6505               | 6505             | 3.1              | 3.5 |
| HA               | 2 | TRP        | 1         | HN              | 2 | TRP        | 1         | 6458               | 6458             | 3.1              | 3.5 |
| HN               | 3 | LYS        | 1         | HT              | 4 | THR        | 1         | 5990               | 5990             | 3.1              | 3.5 |
| HA               | 4 | THR        | 1         | HT              | 4 | THR        | 1         | 4563               | 4563             | 3.3              | 3.5 |
| HB               | 4 | THR        | 1         | HT              | 4 | THR        | 1         | 3041               | 3041             | 3.5              | 3.5 |
| HN               | 2 | TRP        | 1         | HT              | 4 | THR        | 1         | 2981               | 2981             | 3.5              | 3.5 |
| HG <sup>#</sup>  | 3 | LYS        | 2         | HE <sup>#</sup> | 3 | LYS        | 2         | 10160              | 2540             | 3.6              | 4.5 |

The “#” signs indicates diastereotopic protons that were either overlapping or not stereospecifically assigned.

**Compound 7f**

*cyclo*[1,4-(1,2,3-triazole)-L-Phe-D-Trp-D-Lys-L-Thr]

Accepted structures: [26/50]

| prot             | res | Hs  | prot | res             | Hs | integration | corrected   | calc dist |     |
|------------------|-----|-----|------|-----------------|----|-------------|-------------|-----------|-----|
| HB               | 1   | PHE | 1    | HB              | 1  | 964000      | 964000      | 1.8       | 2.7 |
| HB               | 3   | LYS | 1    | HB              | 3  | 537500      | 537500      | 1.9       | 2.7 |
| HA               | 3   | LYS | 1    | HN              | 4  | 357300      | 357300      | 2.1       | 2.7 |
| HA               | 1   | PHE | 1    | HN              | 2  | 256400      | 256400      | 2.2       | 2.7 |
| HB               | 4   | THR | 1    | HA              | 4  | 146800      | 146800      | 2.4       | 2.7 |
| HB               | 2   | TRP | 1    | HA              | 2  | 141500      | 141500      | 2.4       | 2.7 |
| HB               | 1   | PHE | 1    | HA              | 1  | 138700      | 138700      | 2.4       | 2.7 |
| HB               | 1   | PHE | 1    | HA              | 1  | 133100      | 133100      | 2.4       | 2.7 |
| HB               | 2   | TRP | 1    | HA              | 2  | 125700      | 125700      | 2.5       | 2.7 |
| HB               | 4   | THR | 1    | HN              | 4  | 107900      | 107900      | 2.5       | 2.7 |
| HB               | 3   | LYS | 1    | HA              | 3  | 107000      | 107000      | 2.5       | 2.7 |
| HA               | 2   | TRP | 1    | HN              | 3  | 99530       | 99530       | 2.6       | 2.7 |
| HT               | 4   | THR | 1    | HN              | 4  | 92620       | 92620       | 2.6       | 2.7 |
| HA               | 3   | LYS | 1    | HN              | 3  | 91750       | 91750       | 2.6       | 2.7 |
| HB               | 2   | TRP | 1    | HN              | 2  | 75920       | 75920       | 2.7       | 2.7 |
| HG2 <sup>#</sup> | 4   | THR | 3    | HA              | 4  | 214900      | 71633.33333 | 2.7       | 2.7 |
| HB               | 2   | TRP | 1    | HD1             | 2  | 70520       | 70520       | 2.7       | 2.7 |
| HB               | 3   | LYS | 1    | HA              | 3  | 67740       | 67740       | 2.7       | 2.7 |
| HD1              | 2   | TRP | 1    | HE1             | 2  | 67020       | 67020       | 2.7       | 2.7 |
| HG <sup>#</sup>  | 3   | LYS | 2    | HA              | 3  | 127000      | 63500       | 2.8       | 3.5 |
| HB               | 1   | PHE | 1    | HD <sup>#</sup> | 1  | 104600      | 52300       | 2.9       | 3.5 |
| HG2 <sup>#</sup> | 4   | THR | 3    | HA              | 4  | 145800      | 48600       | 2.9       | 3.5 |
| HB               | 2   | TRP | 1    | HE3             | 2  | 46260       | 46260       | 2.9       | 3.5 |
| HA               | 2   | TRP | 1    | HE3             | 2  | 46110       | 46110       | 2.9       | 3.5 |
| HB               | 2   | TRP | 1    | HN              | 2  | 46000       | 46000       | 2.9       | 3.5 |
| HD <sup>#</sup>  | 3   | LYS | 2    | HE <sup>#</sup> | 3  | 181300      | 45325       | 2.9       | 3.5 |
| HA               | 1   | PHE | 1    | HD <sup>#</sup> | 1  | 88430       | 44215       | 2.9       | 3.5 |
| HA               | 2   | TRP | 1    | HN              | 2  | 44180       | 44180       | 2.9       | 3.5 |
| HA               | 4   | THR | 1    | HN              | 4  | 41660       | 41660       | 3.0       | 3.5 |
| HA               | 1   | PHE | 1    | HT              | 4  | 39270       | 39270       | 3.0       | 3.5 |
| HB               | 3   | LYS | 1    | HN              | 3  | 38510       | 38510       | 3.0       | 3.5 |
| HB               | 1   | PHE | 1    | HD <sup>#</sup> | 1  | 72480       | 36240       | 3.0       | 3.5 |
| HB               | 1   | PHE | 1    | HT              | 4  | 34810       | 34810       | 3.1       | 3.5 |
| HG <sup>#</sup>  | 3   | LYS | 2    | HB              | 3  | 67270       | 33635       | 3.1       | 3.5 |
| HB               | 3   | LYS | 1    | HN              | 3  | 32590       | 32590       | 3.1       | 3.5 |
| HB               | 4   | THR | 1    | HT              | 4  | 32330       | 32330       | 3.1       | 3.5 |
| HB               | 2   | TRP | 1    | HE3             | 2  | 32000       | 32000       | 3.1       | 3.5 |
| HG <sup>#</sup>  | 3   | LYS | 2    | HD <sup>#</sup> | 3  | 115500      | 28875       | 3.2       | 3.5 |
| HA               | 3   | LYS | 1    | HT              | 4  | 24400       | 24400       | 3.2       | 3.5 |
| HG <sup>#</sup>  | 3   | LYS | 2    | HE <sup>#</sup> | 3  | 96330       | 24082.5     | 3.3       | 3.5 |
| HE <sup>#</sup>  | 3   | LYS | 2    | HZ <sup>#</sup> | 3  | 125800      | 20966.66667 | 3.3       | 3.5 |
| HG <sup>#</sup>  | 3   | LYS | 2    | HB              | 3  | 41120       | 20560       | 3.3       | 3.5 |
| HD <sup>#</sup>  | 3   | LYS | 2    | HA              | 3  | 32720       | 16360       | 3.5       | 3.5 |
| HA               | 4   | THR | 1    | HT              | 4  | 14240       | 14240       | 3.6       | 4.5 |
| HD <sup>#</sup>  | 3   | LYS | 2    | HZ <sup>#</sup> | 3  | 62380       | 10396.66667 | 3.7       | 4.5 |
| HG2 <sup>#</sup> | 4   | THR | 3    | HN              | 4  | 29520       | 9840        | 3.8       | 4.5 |
| HB               | 3   | LYS | 1    | HD <sup>#</sup> | 3  | 12810       | 6405        | 4.1       | 4.5 |

The “#” signs indicates diastereotopic protons that were either overlapping or not stereospecifically assigned.

**Compound 7g**

*cyclo*[1,4-(1,2,3-triazole)-L-Phe-L-Trp-D-Lys-D-Thr]

Accepted structures: [49/50]

| prot             | res | Hs  | prot | res             | Hs | integration | corrected | calc dist |            |     |     |
|------------------|-----|-----|------|-----------------|----|-------------|-----------|-----------|------------|-----|-----|
| HB               | 2   | TRP | 1    | HB              | 2  | TRP         | 1         | 3062000   | 3062000    | 1.8 | 2.7 |
| HB               | 4   | THR | 1    | HA              | 4  | THR         | 1         | 648800    | 648800     | 2.3 | 2.7 |
| HB               | 3   | LYS | 1    | HA              | 3  | LYS         | 1         | 603000    | 603000     | 2.3 | 2.7 |
| HB               | 2   | TRP | 1    | HA              | 2  | TRP         | 1         | 450200    | 450200     | 2.4 | 2.7 |
| HA               | 4   | THR | 1    | HN              | 4  | THR         | 1         | 438800    | 438800     | 2.4 | 2.7 |
| HA               | 3   | LYS | 1    | HN              | 4  | THR         | 1         | 397400    | 397400     | 2.5 | 2.7 |
| HB <sup>#</sup>  | 1   | PHE | 2    | HA              | 1  | PHE         | 1         | 708900    | 354450     | 2.5 | 2.7 |
| HB <sup>#</sup>  | 1   | PHE | 2    | HN              | 2  | TRP         | 1         | 687300    | 343650     | 2.5 | 2.7 |
| HN               | 4   | THR | 1    | HN              | 3  | LYS         | 1         | 337000    | 337000     | 2.5 | 2.7 |
| HB               | 3   | LYS | 1    | HA              | 3  | LYS         | 1         | 328400    | 328400     | 2.6 | 2.7 |
| HB               | 2   | TRP | 1    | HA              | 2  | TRP         | 1         | 325200    | 325200     | 2.6 | 2.7 |
| HA               | 1   | PHE | 1    | HT              | 4  | THR         | 1         | 315400    | 315400     | 2.6 | 2.7 |
| HG2 <sup>#</sup> | 4   | THR | 3    | HB              | 4  | THR         | 1         | 815800    | 271933.333 | 2.6 | 2.7 |
| HA               | 2   | TRP | 1    | HN              | 3  | LYS         | 1         | 255700    | 255700     | 2.7 | 2.7 |
| HA               | 2   | TRP | 1    | HN              | 2  | TRP         | 1         | 247600    | 247600     | 2.7 | 2.7 |
| HA               | 1   | PHE | 1    | HD <sup>#</sup> | 1  | PHE         | 2         | 495200    | 247600     | 2.7 | 2.7 |
| HB <sup>#</sup>  | 1   | PHE | 2    | HD <sup>#</sup> | 1  | PHE         | 2         | 733100    | 183275     | 2.8 | 3.5 |
| HA               | 3   | LYS | 1    | HN              | 3  | LYS         | 1         | 183000    | 183000     | 2.8 | 3.5 |
| HB               | 3   | LYS | 1    | HN              | 4  | THR         | 1         | 179400    | 179400     | 2.8 | 3.5 |
| HG2 <sup>#</sup> | 4   | THR | 3    | HA              | 4  | THR         | 1         | 530000    | 176666.667 | 2.8 | 3.5 |
| HN               | 3   | LYS | 1    | HT              | 4  | THR         | 1         | 157900    | 157900     | 2.9 | 3.5 |
| HB               | 3   | LYS | 1    | HN              | 3  | LYS         | 1         | 151800    | 151800     | 2.9 | 3.5 |
| HB               | 4   | THR | 1    | HT              | 4  | THR         | 1         | 137700    | 137700     | 3.0 | 3.5 |
| HB               | 2   | TRP | 1    | HN              | 2  | TRP         | 1         | 126100    | 126100     | 3.0 | 3.5 |
| HB               | 3   | LYS | 1    | HN              | 3  | LYS         | 1         | 118200    | 118200     | 3.0 | 3.5 |
| HA               | 1   | PHE | 1    | HN              | 2  | TRP         | 1         | 117300    | 117300     | 3.0 | 3.5 |
| HE <sup>#</sup>  | 3   | LYS | 2    | HZ <sup>#</sup> | 3  | LYS         | 3         | 525500    | 87583.3333 | 3.2 | 3.5 |
| HB               | 2   | TRP | 1    | HN              | 2  | TRP         | 1         | 86340     | 86340      | 3.2 | 3.5 |
| HG <sup>#</sup>  | 3   | LYS | 3    | HE <sup>#</sup> | 3  | LYS         | 2         | 469600    | 78266.6667 | 3.2 | 3.5 |
| HA               | 4   | THR | 1    | HT              | 4  | THR         | 1         | 69900     | 69900      | 3.3 | 3.5 |
| HA               | 2   | TRP | 1    | HT              | 4  | THR         | 1         | 45060     | 45060      | 3.6 | 4.5 |
| HD <sup>#</sup>  | 3   | LYS | 2    | HZ <sup>#</sup> | 3  | LYS         | 3         | 208000    | 34666.6667 | 3.7 | 4.5 |

The triazole HT proton was omitted from calculations for this peptide. The “#” signs indicates diastereotopic protons that were either overlapping or not stereospecifically assigned.

**Compound 7h**
*cyclo*[1,4-(1,2,3-triazole)-L-Phe-D-Trp-L-Lys-D-Thr]

Accepted structures: [23/50]

| prot             | res | Hs  | prot | res             | Hs | integration | corrected | calc dist |             |     |     |
|------------------|-----|-----|------|-----------------|----|-------------|-----------|-----------|-------------|-----|-----|
| HB               | 2   | TRP | 1    | HB              | 2  | TRP         | 1         | 3062000   | 3062000     | 1.8 | 2.7 |
| HA               | 3   | LYS | 1    | HN              | 4  | THR         | 1         | 1412000   | 1412000     | 2.0 | 2.7 |
| HA               | 2   | TRP | 1    | HN              | 3  | LYS         | 1         | 1192000   | 1192000     | 2.1 | 2.7 |
| HA               | 1   | PHE | 1    | HN              | 2  | TRP         | 1         | 1080000   | 1080000     | 2.1 | 2.7 |
| HB               | 4   | THR | 1    | HA              | 4  | THR         | 1         | 867000    | 867000      | 2.2 | 2.7 |
| HA               | 1   | PHE | 1    | HT              | 1  | PHE         | 1         | 475900    | 475900      | 2.4 | 2.7 |
| HB               | 2   | TRP | 1    | HD1             | 2  | TRP         | 1         | 429800    | 429800      | 2.4 | 2.7 |
| HB               | 2   | TRP | 1    | HA              | 2  | TRP         | 1         | 421400    | 421400      | 2.4 | 2.7 |
| HB <sup>#</sup>  | 1   | PHE | 2    | HA              | 1  | PHE         | 1         | 781900    | 390950      | 2.5 | 2.7 |
| HB               | 3   | LYS | 1    | HA              | 3  | LYS         | 1         | 353400    | 353400      | 2.5 | 2.7 |
| HB               | 3   | LYS | 1    | HA              | 3  | LYS         | 1         | 336200    | 336200      | 2.5 | 2.7 |
| HB               | 2   | TRP | 1    | HA              | 2  | TRP         | 1         | 296400    | 296400      | 2.6 | 2.7 |
| HB               | 3   | LYS | 1    | HN              | 3  | LYS         | 1         | 295000    | 295000      | 2.6 | 2.7 |
| HB               | 4   | THR | 1    | HG1             | 4  | THR         | 1         | 285400    | 285400      | 2.6 | 2.7 |
| HN               | 4   | THR | 1    | HT              | 1  | PHE         | 1         | 264100    | 264100      | 2.6 | 2.7 |
| HT               | 1   | PHE | 1    | HN              | 2  | TRP         | 1         | 260400    | 260400      | 2.7 | 2.7 |
| HG2 <sup>#</sup> | 4   | THR | 3    | HB              | 4  | THR         | 1         | 738400    | 246133.3333 | 2.7 | 2.7 |
| HB               | 4   | THR | 1    | HN              | 4  | THR         | 1         | 189800    | 189800      | 2.8 | 3.5 |
| HG <sup>#</sup>  | 3   | LYS | 2    | HA              | 3  | LYS         | 1         | 378600    | 189300      | 2.8 | 3.5 |
| HA               | 4   | THR | 1    | HN              | 4  | THR         | 1         | 185300    | 185300      | 2.8 | 3.5 |
| HA               | 3   | LYS | 1    | HN              | 3  | LYS         | 1         | 171300    | 171300      | 2.8 | 3.5 |
| HB               | 2   | TRP | 1    | HN              | 2  | TRP         | 1         | 168600    | 168600      | 2.9 | 3.5 |
| HD1              | 2   | TRP | 1    | HE1             | 2  | TRP         | 1         | 168300    | 168300      | 2.9 | 3.5 |
| HA               | 2   | TRP | 1    | HN              | 2  | TRP         | 1         | 165600    | 165600      | 2.9 | 3.5 |
| HA               | 1   | PHE | 1    | HD <sup>#</sup> | 1  | PHE         | 2         | 330200    | 165100      | 2.9 | 3.5 |
| HG2 <sup>#</sup> | 4   | THR | 3    | HA              | 4  | THR         | 1         | 493800    | 164600      | 2.9 | 3.5 |
| HB <sup>#</sup>  | 1   | PHE | 2    | HD <sup>#</sup> | 1  | PHE         | 2         | 641000    | 160250      | 2.9 | 3.5 |
| HB               | 2   | TRP | 1    | HN              | 2  | TRP         | 1         | 159700    | 159700      | 2.9 | 3.5 |
| HB               | 2   | TRP | 1    | HD1             | 2  | TRP         | 1         | 151100    | 151100      | 2.9 | 3.5 |
| HG <sup>#</sup>  | 3   | LYS | 2    | HB              | 3  | LYS         | 1         | 174700    | 87350       | 3.2 | 3.5 |
| HB               | 3   | LYS | 1    | HN              | 3  | LYS         | 1         | 82580     | 82580       | 3.2 | 3.5 |
| HE <sup>#</sup>  | 3   | LYS | 2    | HZ <sup>#</sup> | 3  | LYS         | 3         | 471000    | 78500       | 3.2 | 3.5 |
| HB               | 4   | THR | 1    | HT              | 1  | PHE         | 1         | 70640     | 70640       | 3.3 | 3.5 |
| HG <sup>#</sup>  | 3   | LYS | 2    | HE <sup>#</sup> | 3  | LYS         | 2         | 275900    | 68975       | 3.3 | 3.5 |
| HA               | 4   | THR | 1    | HT              | 1  | PHE         | 1         | 55690     | 55690       | 3.4 | 3.5 |
| HG <sup>#</sup>  | 3   | LYS | 2    | HN              | 3  | LYS         | 1         | 103200    | 51600       | 3.5 | 3.5 |
| HG2 <sup>#</sup> | 4   | THR | 3    | HN              | 4  | THR         | 1         | 136000    | 45333.33333 | 3.6 | 4.5 |
| HG2 <sup>#</sup> | 4   | THR | 3    | HG1             | 4  | THR         | 1         | 67290     | 22430       | 4.0 | 4.5 |
| HB <sup>#</sup>  | 1   | PHE | 2    | HT              | 1  | PHE         | 1         | 26210     | 13105       | 4.4 | 4.5 |

The “#” signs indicates diastereotopic protons that were either overlapping or not stereospecifically assigned.

## 5. Analysis of compounds as mimics of various $\beta$ -turn motifs.

The pharmacophoric region of somatostatin adopts a type II'  $\beta$ -turn, but several other  $\beta$ -turn types are known and represent appealing targets for drug design. To assess the potential of the triazole-modified cyclic tetrapeptides as mimics of common  $\beta$ -turn motifs, we first tabulated dihedral angles for each of our reported structures (Table S1) using the dihedral angle measurement tool in MacPymol. These angles were compared to the dihedral angles of idealized  $\beta$ -turn motifs<sup>S8</sup> (Table S2) to identify peptides that would likely serve as close mimics of the particular  $\beta$ -turn types. For each  $\beta$ -turn motif examined, several of the identified peptides were subsequently pairfit to the structure of the  $\beta$ -turn (constructed using the mean dihedral angles reported in ref. S8 and Table S2). The overlay giving the lowest RMSD value for the  $C_\alpha$  and  $C_\beta$  atoms of residues  $i + 1$  and  $i + 2$  for each  $\beta$ -turn type is presented in Figure S2.

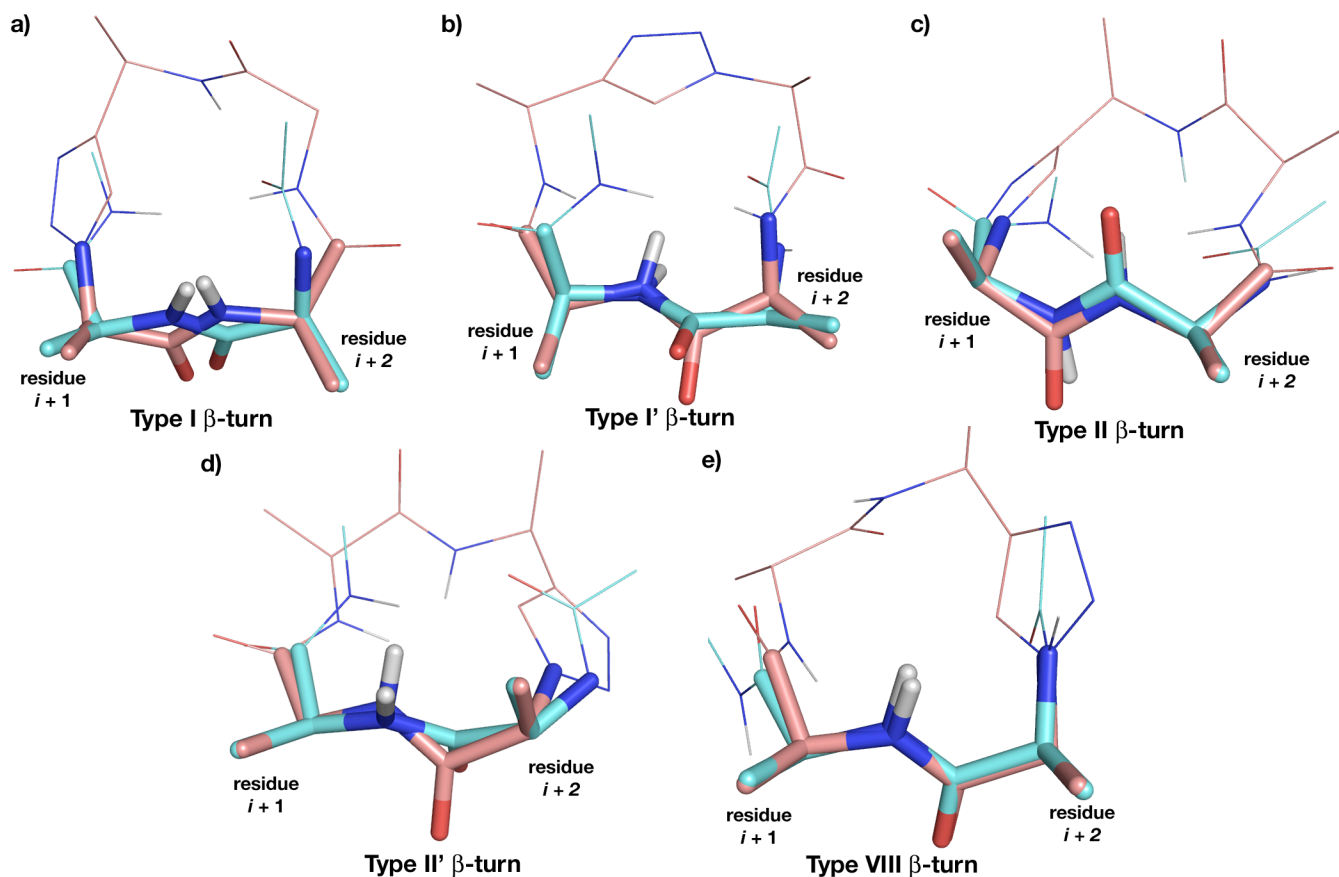

**Figure S2.** Overlays of triazole-containing pseudo-tetrapeptides with idealized structures of various  $\beta$ -turn motifs. In all panels, the  $\beta$ -turn is colored cyan while the triazole-modified peptide is colored pink. (a) Overlay of a type I  $\beta$ -turn onto peptide *ent-7a* (RMSD = 0.232 Å for  $C_\alpha$  and  $C_\beta$  atoms of residues  $i + 1$  and  $i + 2$ ). Note that the turn motif and peptide have opposite N→C orientations in this overlay. (b) Overlay of a type I'  $\beta$ -turn onto peptide **7a** (RMSD = 0.314 Å for  $C_\alpha$  and  $C_\beta$  atoms of residues  $i + 1$  and  $i + 2$ ). (c) Overlay of a type II  $\beta$ -turn onto peptide *ent-7a* (RMSD = 0.057 Å for  $C_\alpha$  and  $C_\beta$  atoms of residues  $i + 1$  and  $i + 2$ ). Note that the turn motif and peptide have opposite N→C orientations in this overlay. (d) Overlay of a type II'  $\beta$ -turn onto peptide **7a** (RMSD = 0.081 Å for  $C_\alpha$  and  $C_\beta$  atoms of residues  $i + 1$  and  $i + 2$ ). (e) Overlay of a type VIII  $\beta$ -turn onto peptide **7d** (RMSD = 0.105 Å for  $C_\alpha$  and  $C_\beta$  atoms of residues  $i + 1$  and  $i + 2$ ).

S8.) E. G. Hutchinson and J. M. Thornton, *Protein Sci.* **1994**, *3*, 2207-2216.

**Table S2.** Compilation of peptide phi ( $\Phi$ ) and psi ( $\Psi$ ) dihedral angles.<sup>[a]</sup>

| Compound      | Chirality | Phe               | Trp                |        | Lys                |        | Thr                |
|---------------|-----------|-------------------|--------------------|--------|--------------------|--------|--------------------|
|               |           | $\Psi$            | $\Phi$             | $\Psi$ | $\Phi$             | $\Psi$ | $\Phi$             |
| <b>7a</b>     | LLLL      | -66               | -144               | 37     | 143                | 61     | 112                |
| <b>7b</b>     | DLLL      | 82                | -109               | 55     | 142                | -92    | -72                |
| <b>7c</b>     | LDLL      | 41                | -147               | 86     | -80                | -67    | -92                |
| <b>7d</b>     | LLDL      | -46               | -127               | 85     | -105               | 73     | -107               |
| <b>7e</b>     | DDDL      | -65               | -106               | -55    | -119               | 92     | -81                |
| <b>7f</b>     | LDDL      | 52                | -130               | 85     | 74                 | 85     | -84                |
| <b>7g</b>     | LLDD      | -34               | -143               | 79     | -111               | 45     | 140                |
| <b>7h</b>     | LDLD      | 81                | -109               | 78     | -114               | 92     | -73                |
| <b>ent-7a</b> | DDDD      | -66               | -144               | 37     | 143                | 61     | 112                |
| <b>ent-7b</b> | LDDD      | 81                | -109               | 55     | 142                | -92    | -72                |
| <b>ent-7c</b> | DLDD      | 41                | -147               | 86     | -80                | -67    | -92                |
| <b>ent-7d</b> | DDLD      | -46               | -127               | 85     | -105               | 73     | -107               |
| <b>ent-7e</b> | LLLD      | -65               | -106               | -55    | -119               | 92     | -81                |
| <b>ent-7f</b> | DLLD      | 52                | -130               | 85     | 74                 | 85     | -84                |
| <b>ent-7g</b> | DDLL      | -34               | -143               | 79     | -111               | 45     | 140                |
| <b>ent-7h</b> | DLDL      | 81                | -109               | 78     | -114               | 92     | -73                |
| <b>1</b>      | LLLL      | <b>Leu</b><br>-64 | <b>Leu</b><br>-110 | -46    | <b>Lys</b><br>-129 | 90     | <b>Phe</b><br>-85  |
| <b>2</b>      | DLD~      | <b>Leu</b><br>41  | <b>Phe</b><br>-130 | 84     | <b>Leu</b><br>-103 | 73     | <b>Gly</b><br>-105 |

<sup>[a]</sup> For amino acids having D-chirality, the transformation ( $\Phi$ ,  $\Psi$ )  $\rightarrow$  ( $-\Phi$ ,  $-\Psi$ ) was applied, following the convention for reporting dihedral angles of D-amino acids. For a discussion of this convention, see ref S9.

**Table S3.** Phi ( $\Phi$ ) and psi ( $\Psi$ ) dihedral angles for mean and idealized  $\beta$ -turn motifs (taken from ref. S8).<sup>[a]</sup>

| $\beta$ -turn    | $i + 1$   |             | $i + 2$     |          |
|------------------|-----------|-------------|-------------|----------|
|                  | $\Phi$    | $\Psi$      | $\Phi$      | $\Psi$   |
| <b>type I</b>    | -64 (-60) | -27 (-30)   | -90 (-90)   | -7 (0)   |
| <b>type I'</b>   | 55 (60)   | 38 (30)     | 78 (90)     | 6 (0)    |
| <b>type II</b>   | -60 (-60) | 131 (120)   | 84 (80)     | 1 (0)    |
| <b>type II'</b>  | 60 (60)   | -126 (-120) | -91 (-80)   | 1 (0)    |
| <b>type VIII</b> | -72 (-60) | -33 (-30)   | -123 (-120) | 121(120) |

<sup>[a]</sup> Mean dihedral angles and idealized dihedral angles are reported, with the idealized values in parentheses.

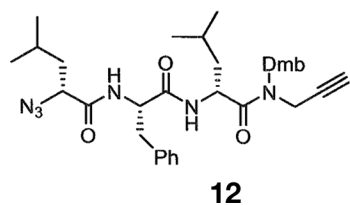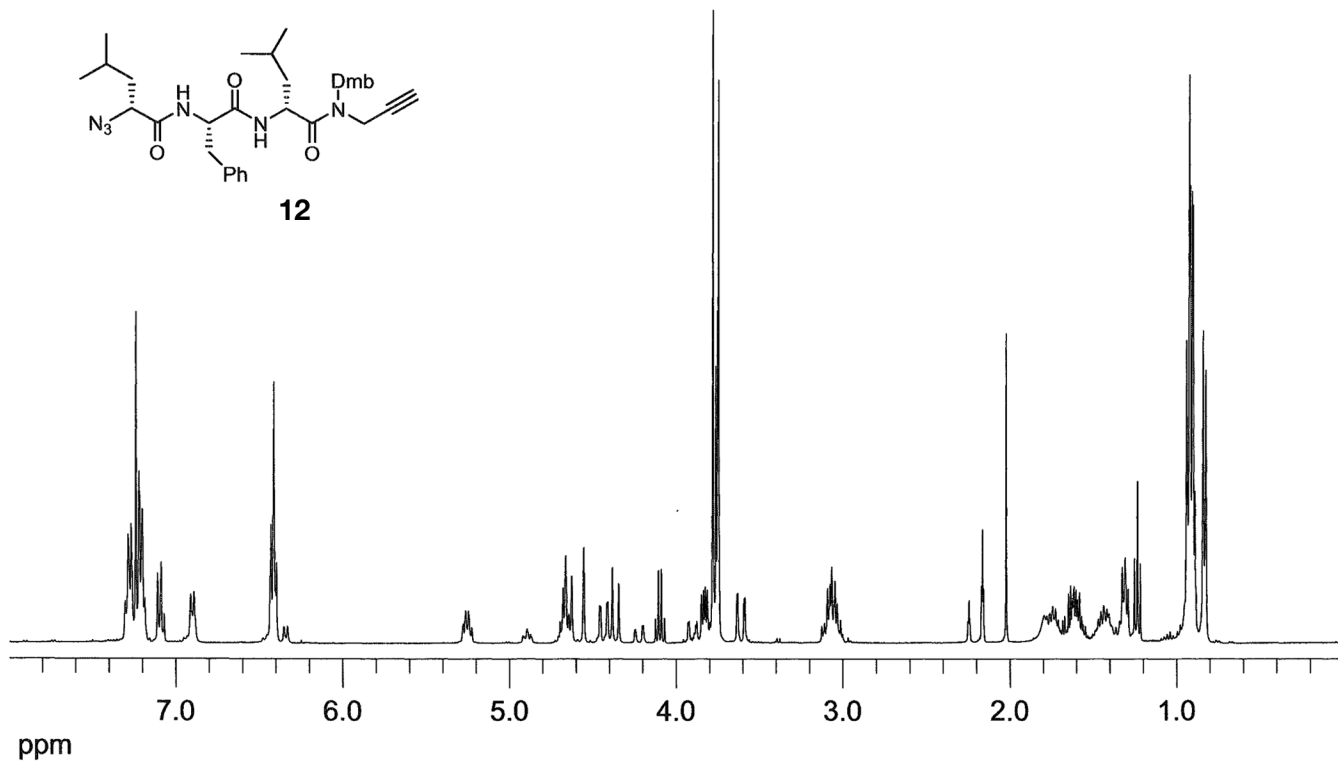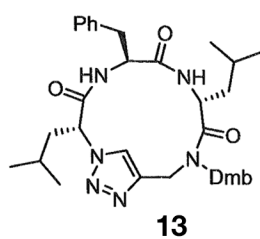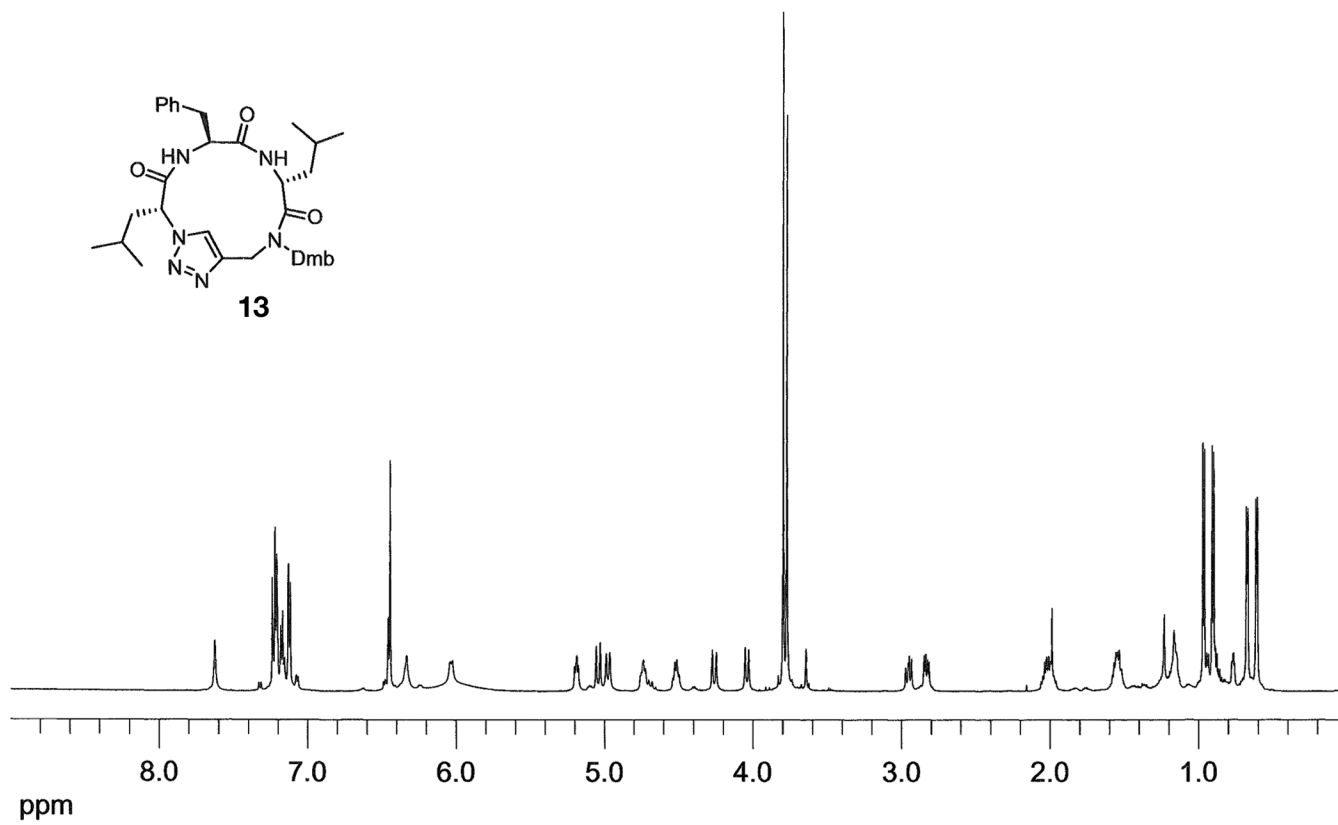

**Figure S3.** <sup>1</sup>H NMR spectra for compounds **12** and **13**.



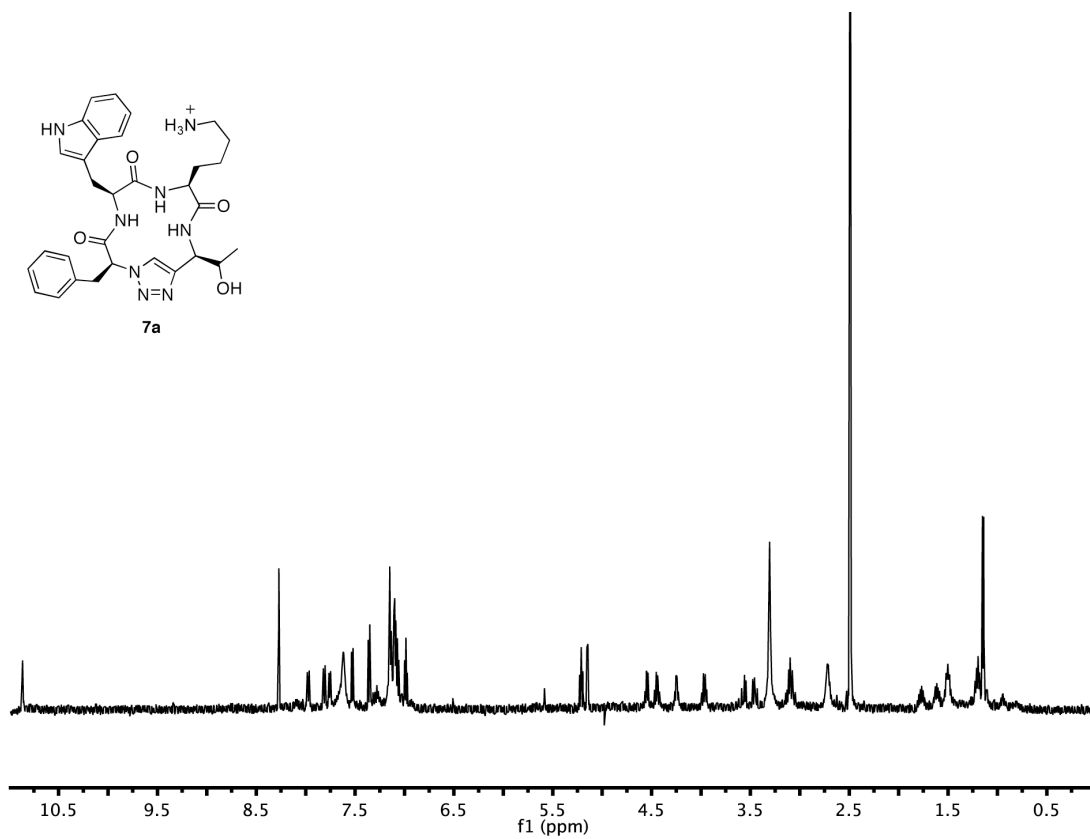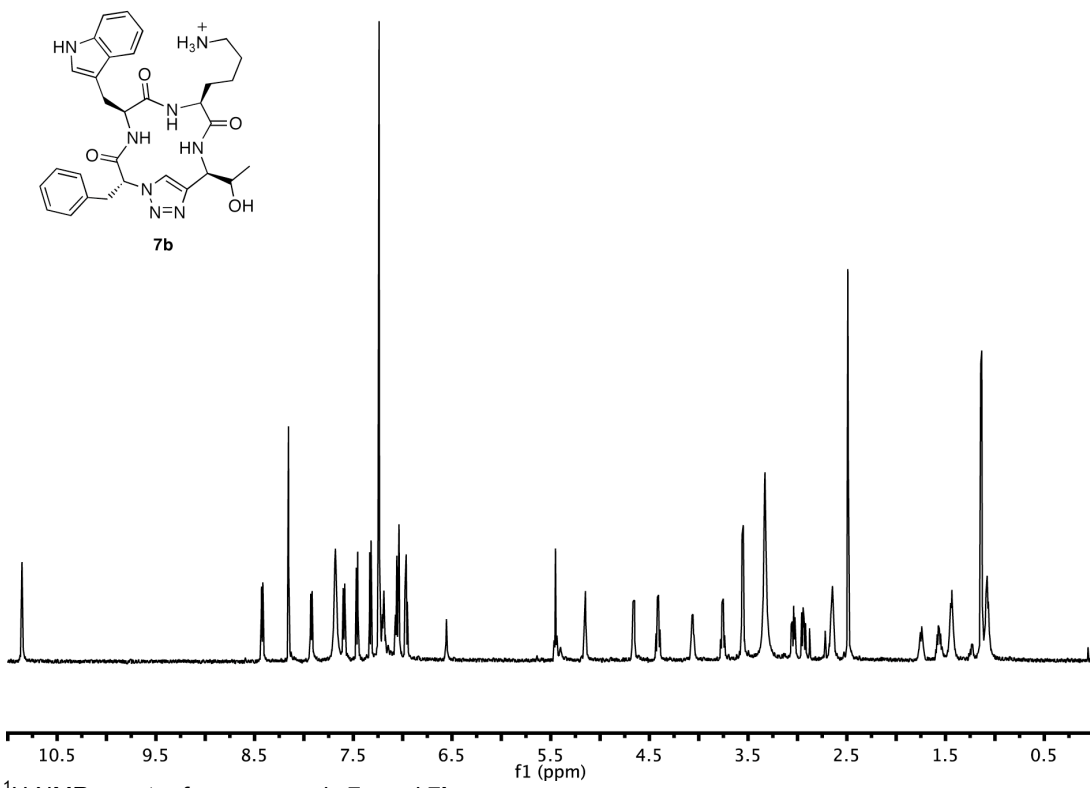

**Figure S4.** <sup>1</sup>H NMR spectra for compounds **7a** and **7b**.

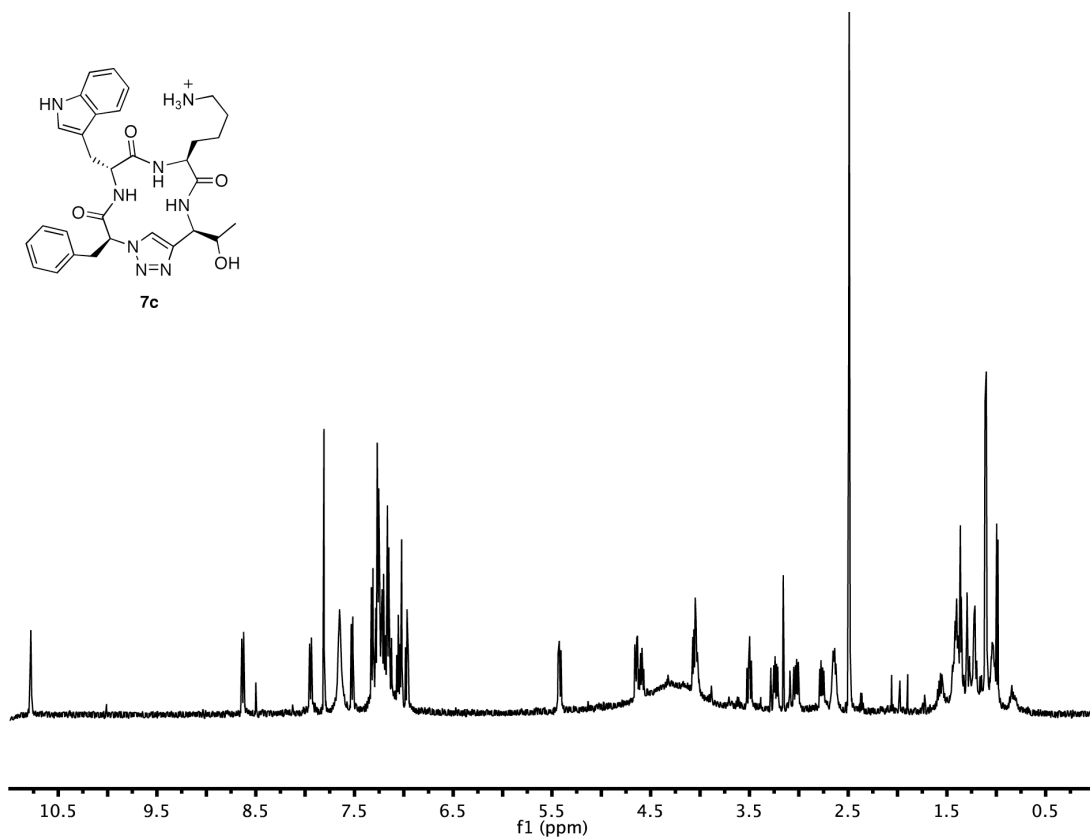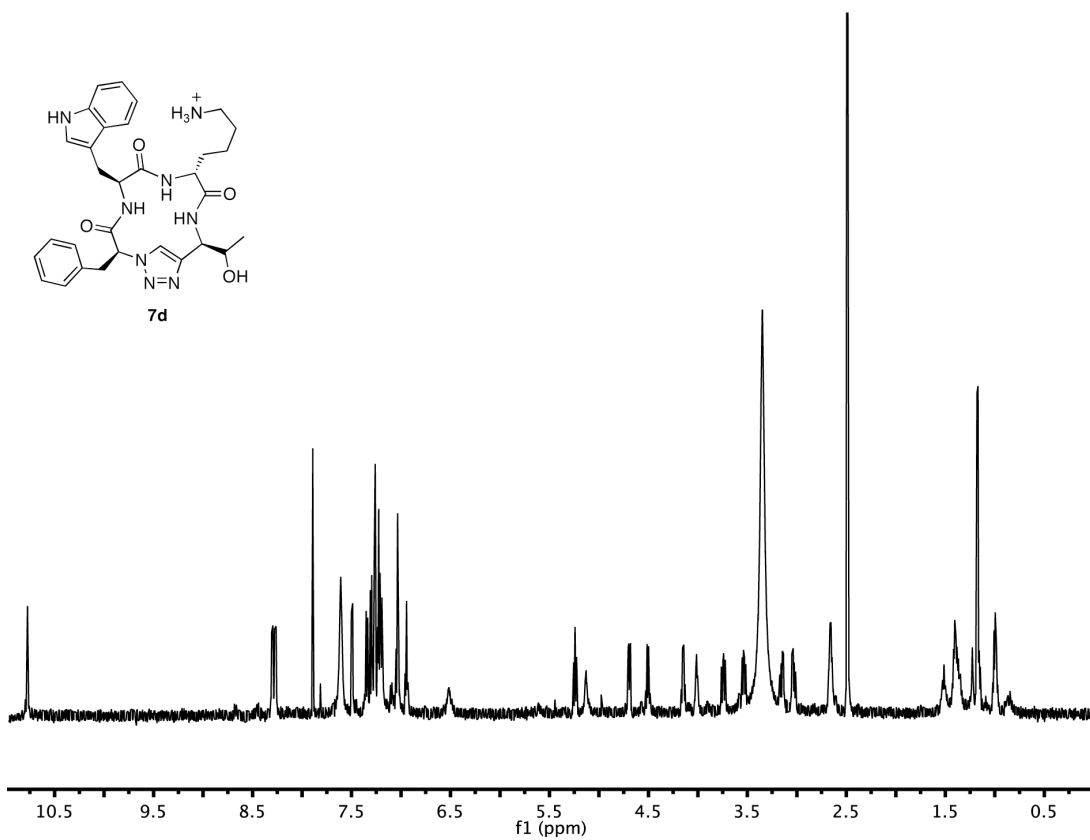

**Figure S5.** <sup>1</sup>H NMR spectra for compounds **7c** and **7d**.

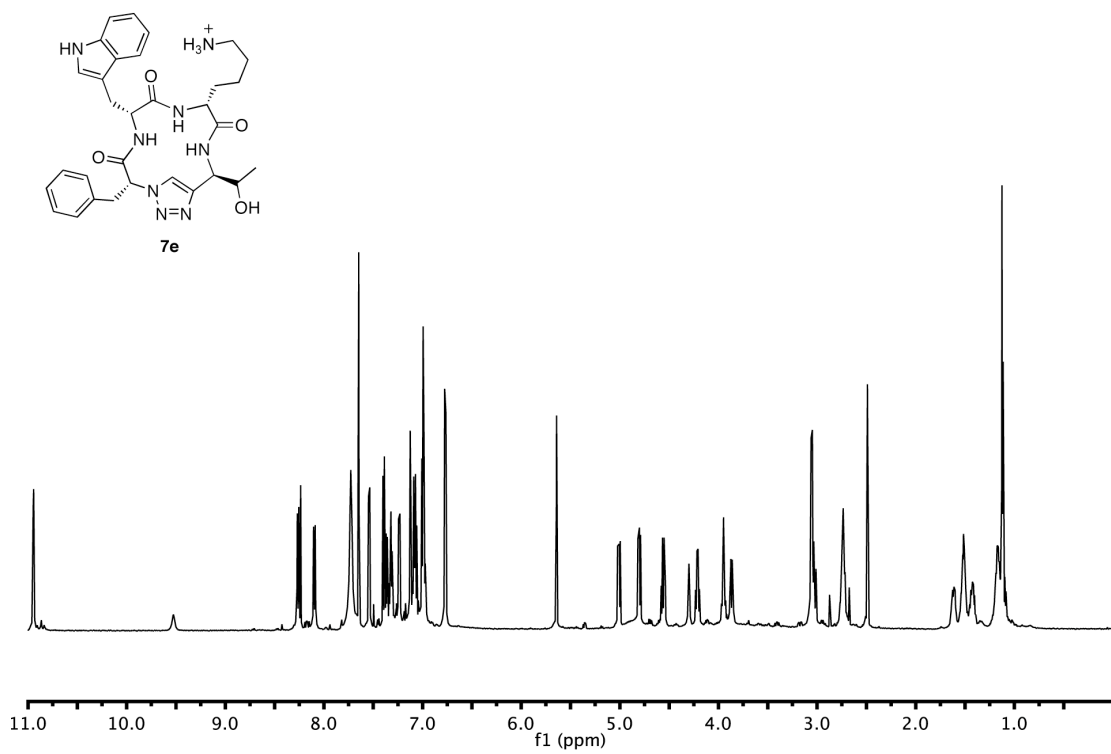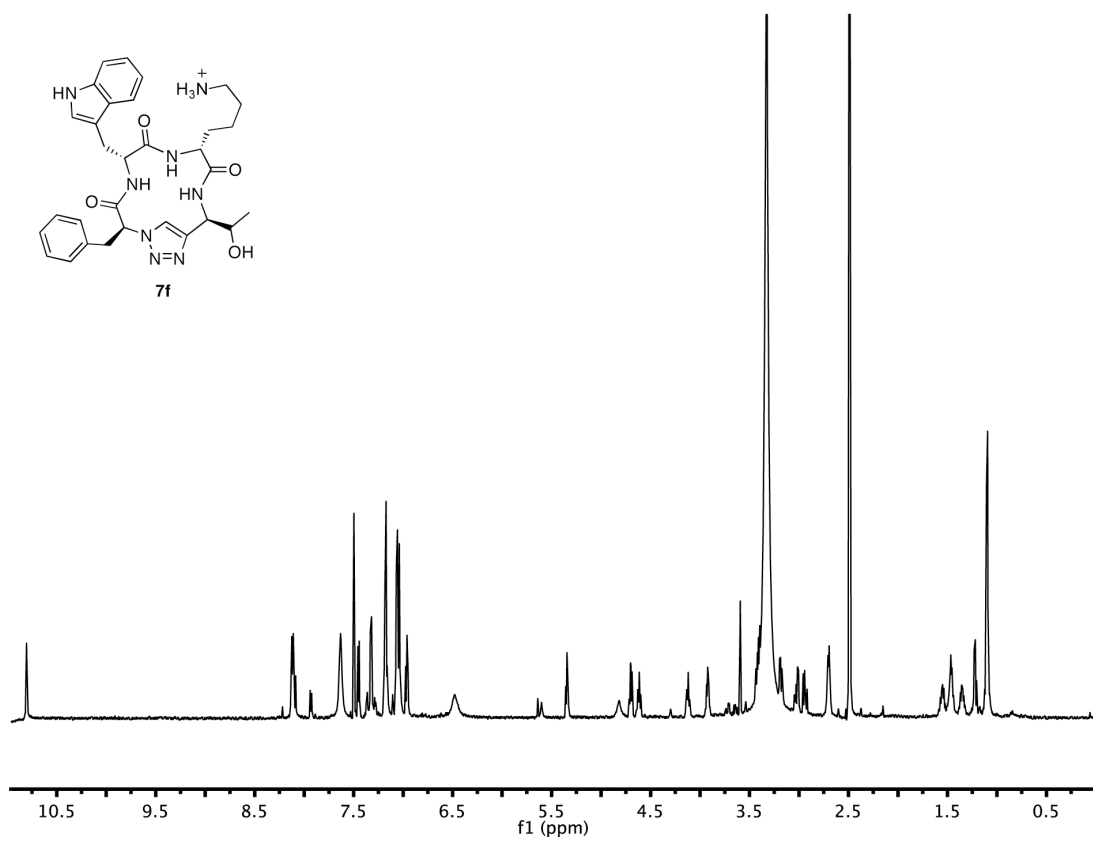

**Figure S6.**  $^1\text{H}$  NMR spectra for compounds **7e** and **7f**.

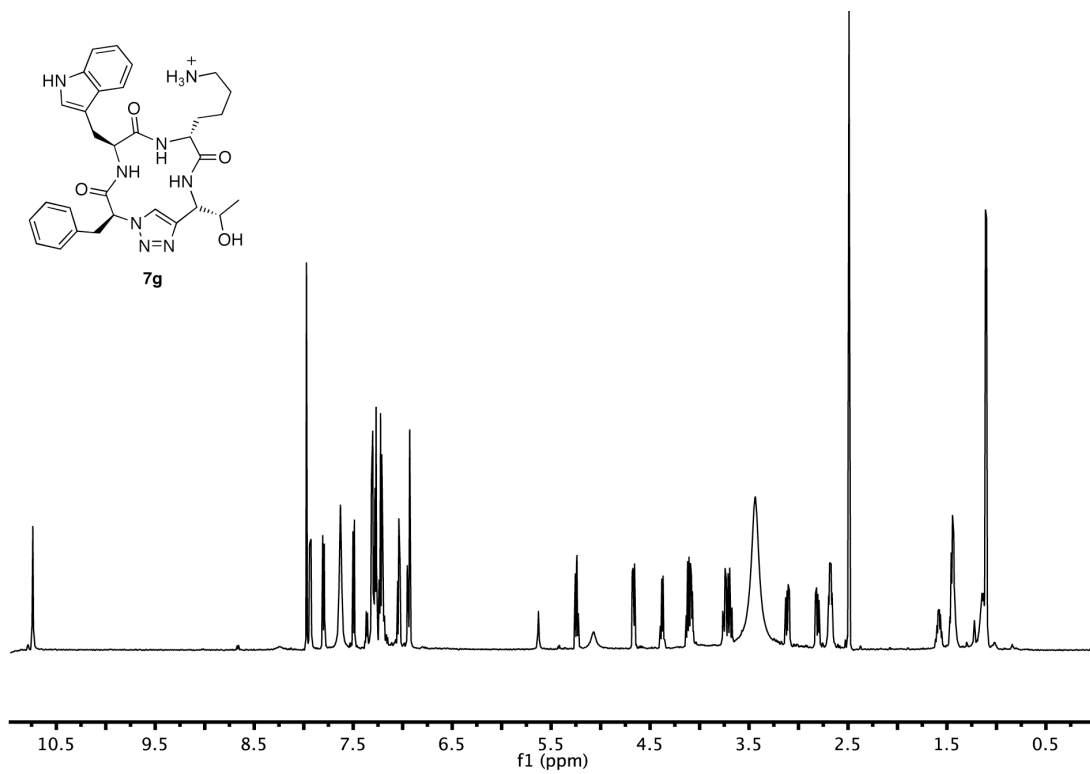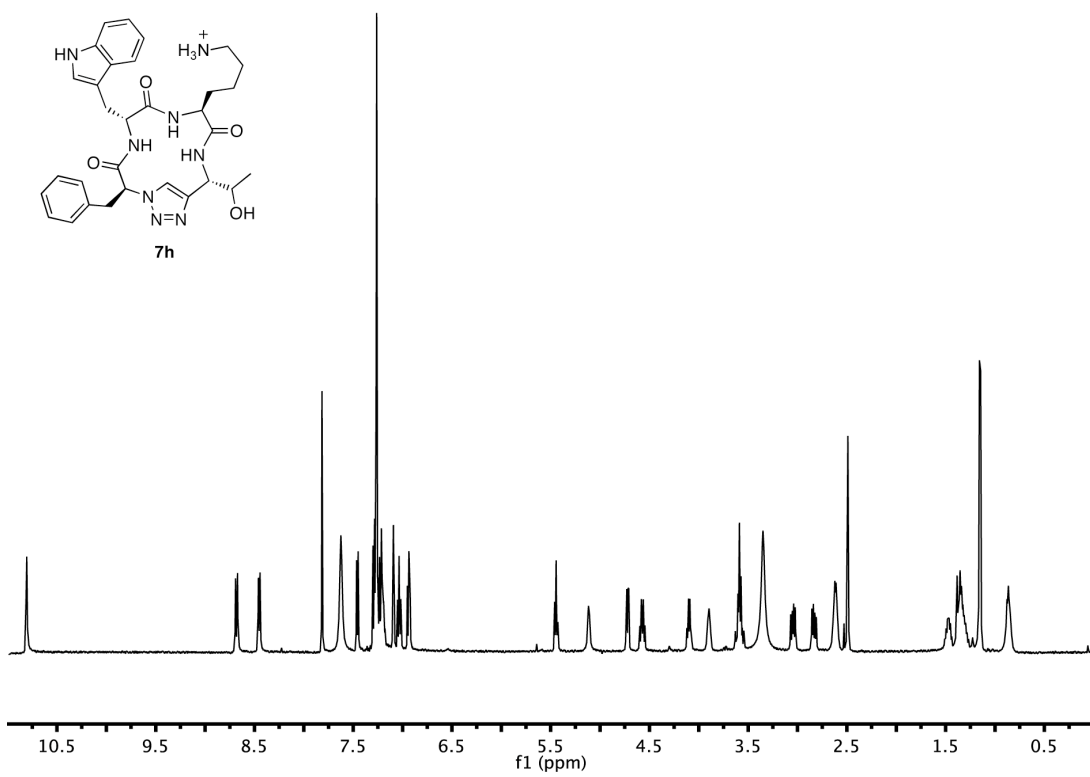

**Figure S7.**  $^1\text{H}$  NMR spectra for compounds **7g** and **7h**.
